# Supplementary material
Source: PubMed Central journal article supplement (PMC7497842)
Supplement: NIHMS1606323-supplement-supplementary_materials.pdf [file NIHMS1606323-supplement-supplementary_materials.pdf]

## SUPPLEMENTARY INFORMATION

**Title:** Nutriome-metabolome relationships provide insights into dietary intake and metabolism

**Authors:** Joram M. Posma <sup>1,2</sup>, Isabel Garcia-Perez <sup>3</sup>, Gary Frost <sup>3</sup>, Ghadeer S. Aljuraiban <sup>4,5</sup>, Queenie Chan <sup>5,6</sup>, Linda Van Horn <sup>7</sup>, Martha Daviglius <sup>8</sup>, Jeremiah Stamler <sup>7</sup>, Elaine Holmes <sup>3,9,10,11,\*</sup>, Paul Elliott <sup>2,5,6,9,12,13,\*</sup>, Jeremy K. Nicholson <sup>10,11,\*</sup>

**Affiliations:** <sup>1</sup> Division of Systems Medicine, Department of Metabolism, Digestion and Reproduction, Faculty of Medicine, South Kensington Campus, Imperial College London, SW7 2AZ, U.K.; <sup>2</sup> Health Data Research UK-London, U.K.; <sup>3</sup> Division of Digestive Diseases, Department of Metabolism, Digestion and Reproduction, Faculty of Medicine, Hammersmith Campus, Imperial College London, W12 0NN, U.K.; <sup>4</sup> The Department of Community Health Sciences, College of Applied Medical Sciences, King Saud University, Riyadh, Kingdom of Saudi Arabia; <sup>5</sup> Department of Epidemiology and Biostatistics, School of Public Health, Faculty of Medicine, St. Mary's Campus, Imperial College London, W2 1PG, U.K.; <sup>6</sup> MRC Centre for Environment and Health, School of Public Health, Faculty of Medicine, St. Mary's Campus, Imperial College London, W2 1PG, U.K.; <sup>7</sup> Department of Preventive Medicine, Feinberg School of Medicine, Northwestern University, Chicago, IL 60611, U.S.A.; <sup>8</sup> Institute for Minority Health Research, University of Illinois at Chicago, Chicago, IL 60612; <sup>9</sup> UK Dementia Research Institute, Faculty of Medicine, Hammersmith Campus, Imperial College London, W12 0NN, U.K.; <sup>10</sup> Division of Computational and Systems Medicine, Health Futures Institute, Murdoch University, Perth, WA 6150, Australia; <sup>11</sup> The Australian National Phenome Center, Harry Perkins Institute, Murdoch University, WA 6150, Australia; <sup>12</sup> National Institute for Health Research Imperial Biomedical Research Centre, St. Mary's Campus, Imperial College London, W2 1PG, U.K.; <sup>13</sup> British Heart Foundation Centre of Research Excellence at Imperial, Imperial College London, W2 1PG, U.K.

**Correspondence:** jeremy.nicholson@murdoch.edu.au, p.elliott@imperial.ac.uk, elaine.holmes@murdoch.edu.au.

## SUPPLEMENTARY FIGURES

A

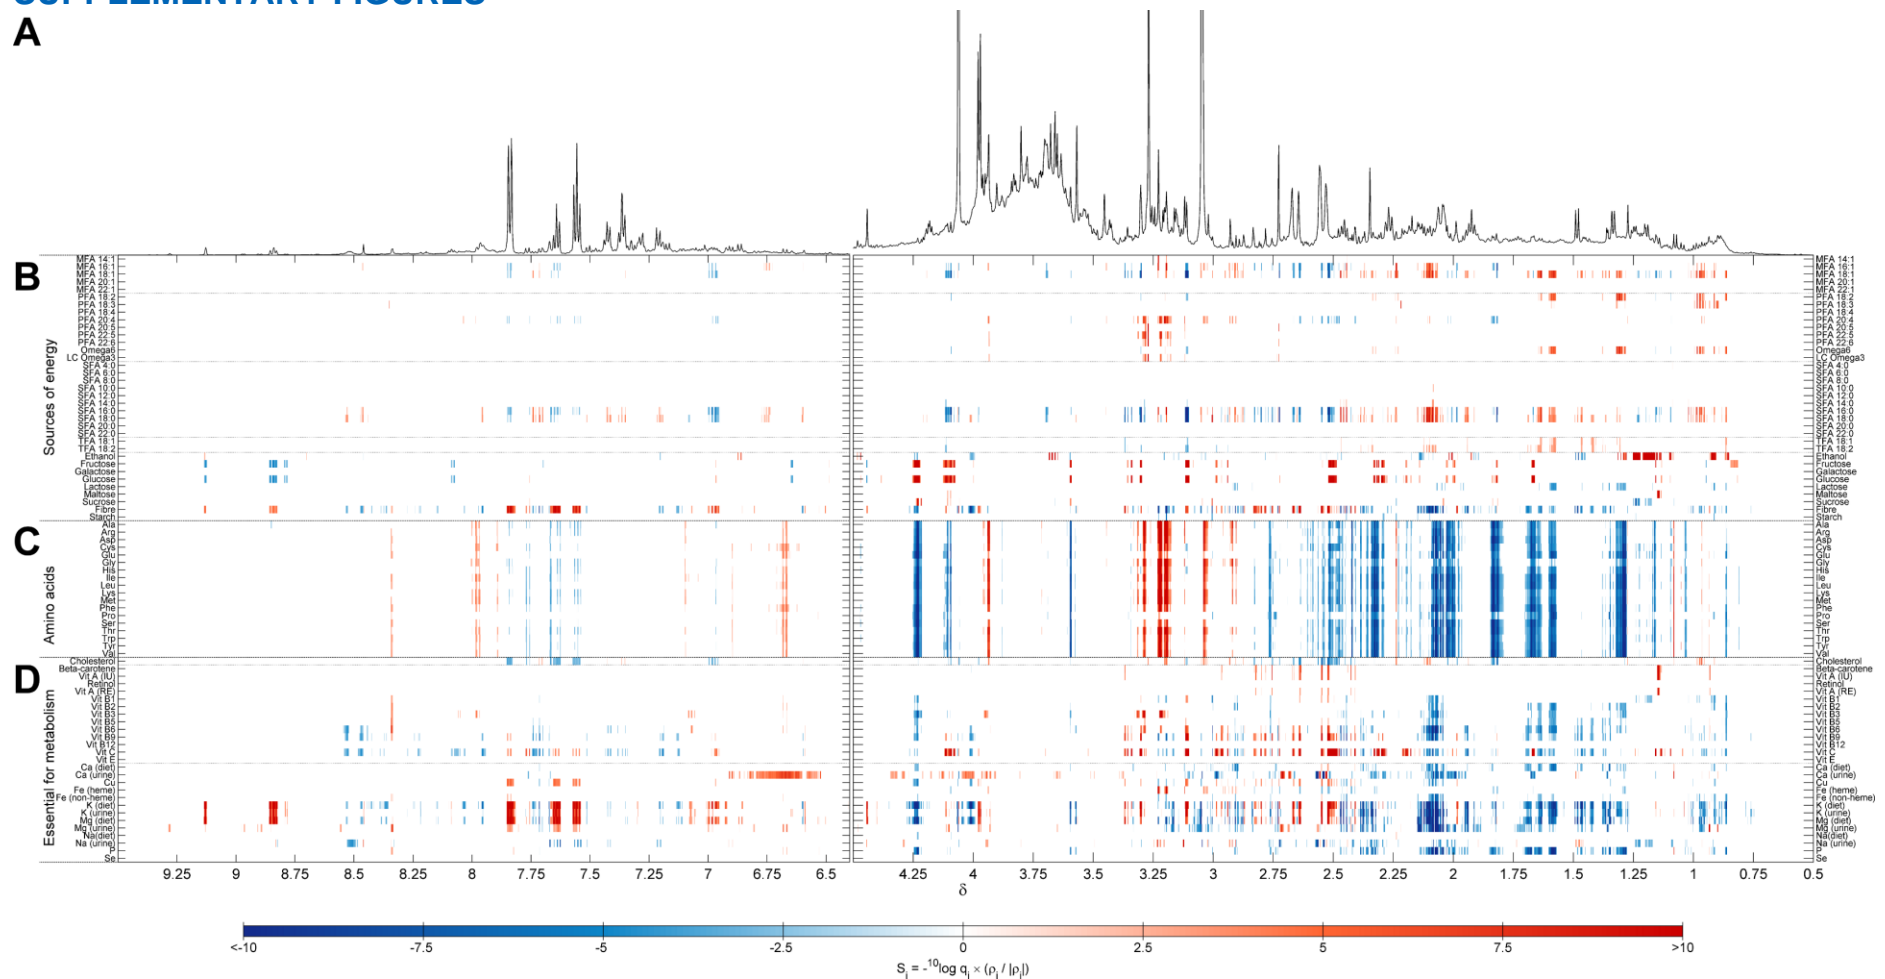

**Supplementary Figure 1. The metabolic influence potential of 80 nutrients in the U.S. INTERMAP population. (A)** Median  $^1\text{H-NMR}$  spectrum of both visits. **(B, C, D)** The skyline projection of the significant associations ( $-10 \log(q) \times \text{sign}(p)$ , bounded to limits -10 and 10, where  $q$  is the false discovery rate  $q$ -value) for all nutrients for both visits combined (least significant visit shown for each variable); positive associations are shown in shades of red and inverse associations in shades of blue. **(B)** Nutrients that are energy providing (fatty acids, alcohol, sugars, fibre, starch), **(C)** dietary amino acids and **(D)** are essential for supporting metabolism (cholesterol, vitamins and derivatives, minerals).

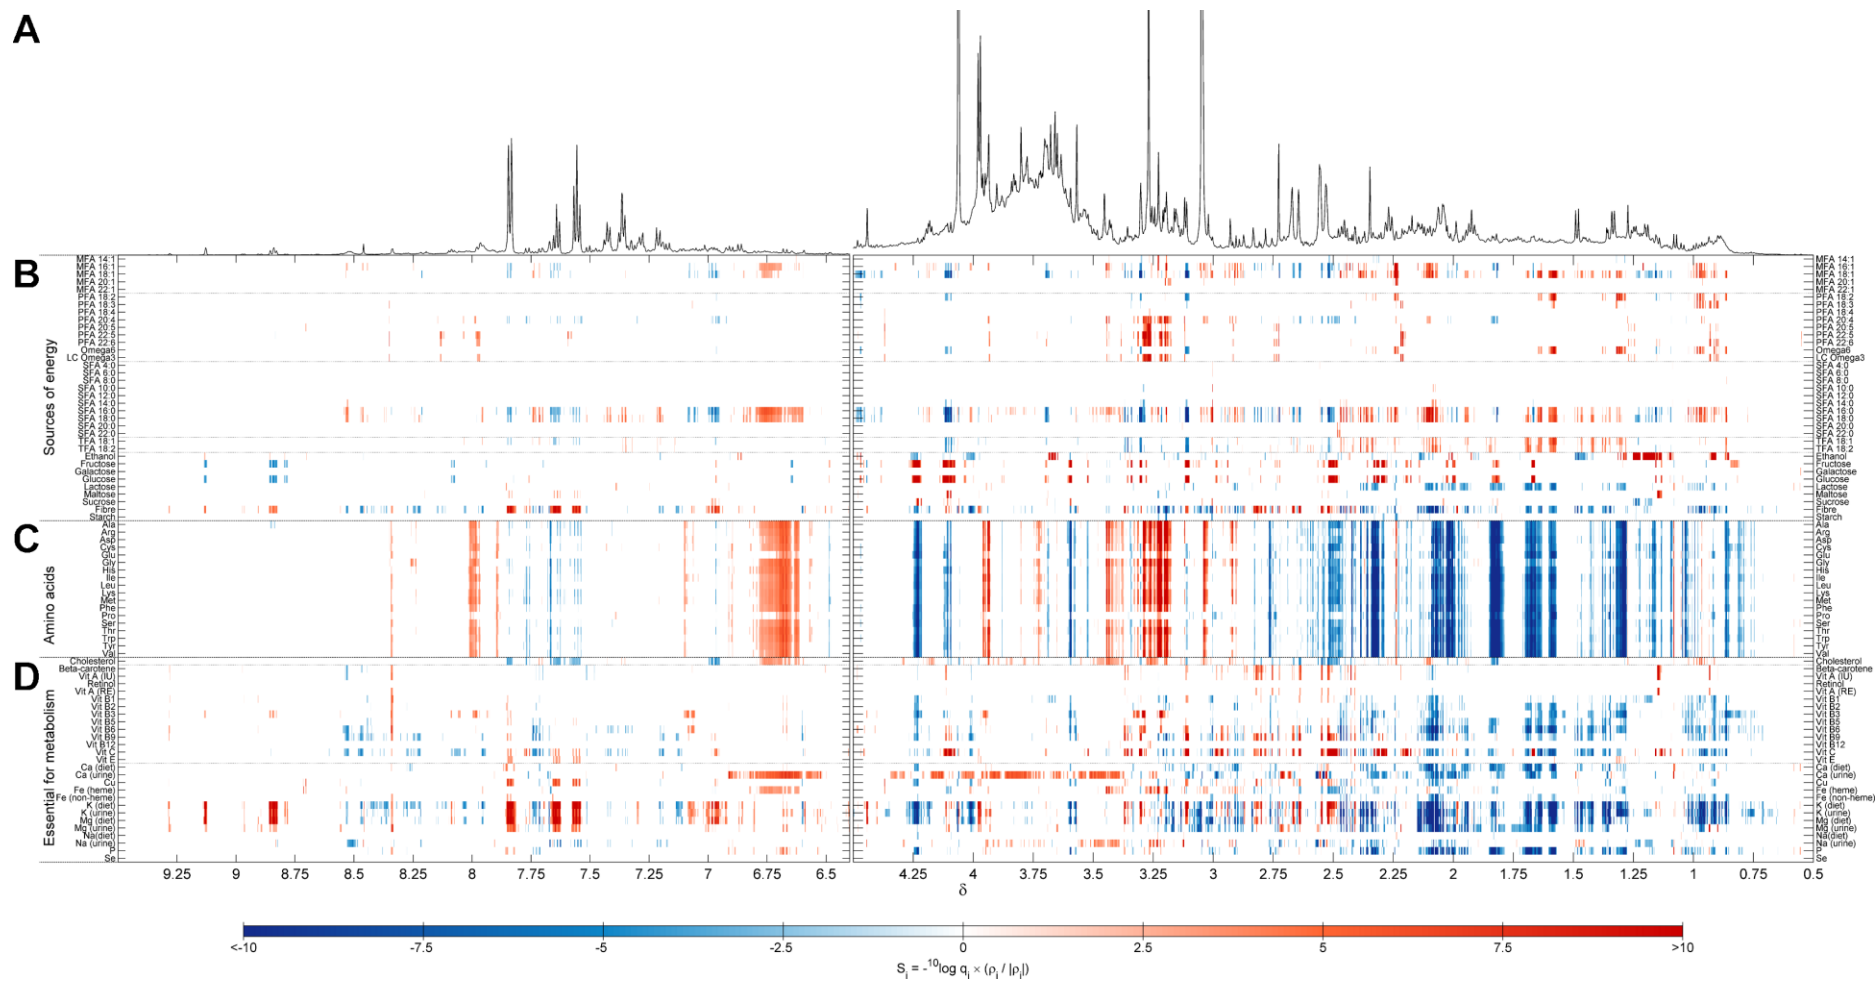

**Supplementary Figure 2. The metabolic signatures of 80 nutrients in the U.S. INTERMAP population (first visit).** (A) Median  $^1\text{H}$ -NMR spectrum of the first visit. (B, C, D) The skyline projection of the significant associations ( $-10 \log(q) \times \text{sign}(\rho)$ , bounded to limits -10 and 10, where  $q$  is the false discovery rate  $q$ -value) for all nutrients for the first visit; positive associations are shown in shades of red and inverse associations in shades of blue. (B) Nutrients that are energy providing (fatty acids, alcohol, sugars, fibre, starch), (C) dietary amino acids and (D) are essential for supporting metabolism (cholesterol, vitamins and derivatives, minerals).

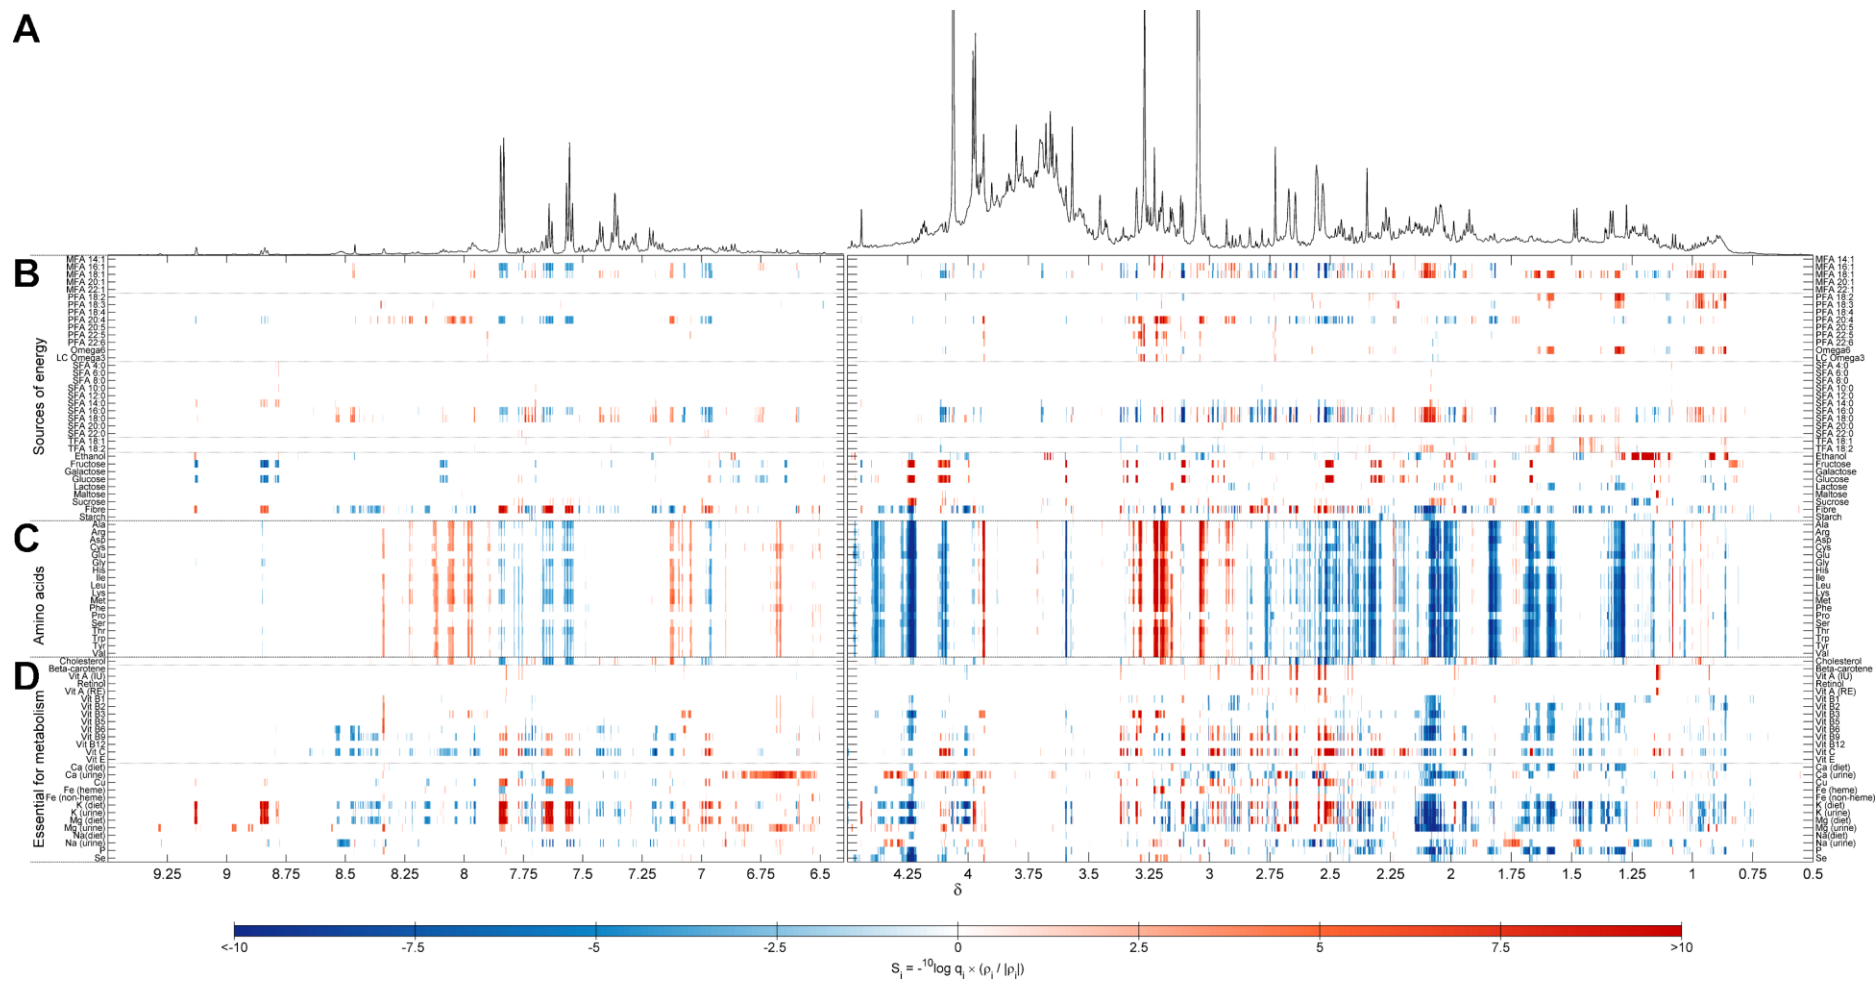

**Supplementary Figure 3. The metabolic signatures of 80 nutrients in the U.S. INTERMAP population (second visit).** (A) Median  $^1\text{H}$ -NMR spectrum of the second visit. (B, C, D) The skyline projection of the significant associations ( $-^{10} \log(q) \times \text{sign}(\rho)$ ), bounded to limits -10 and 10, where  $q$  is the false discovery rate  $q$ -value) for all nutrients for the second visit; positive associations are shown in shades of red and inverse associations in shades of blue. (B) Nutrients that are energy providing (fatty acids, alcohol, sugars, fibre, starch), (C) dietary amino acids and (D) are essential for supporting metabolism (cholesterol, vitamins and derivatives, minerals).

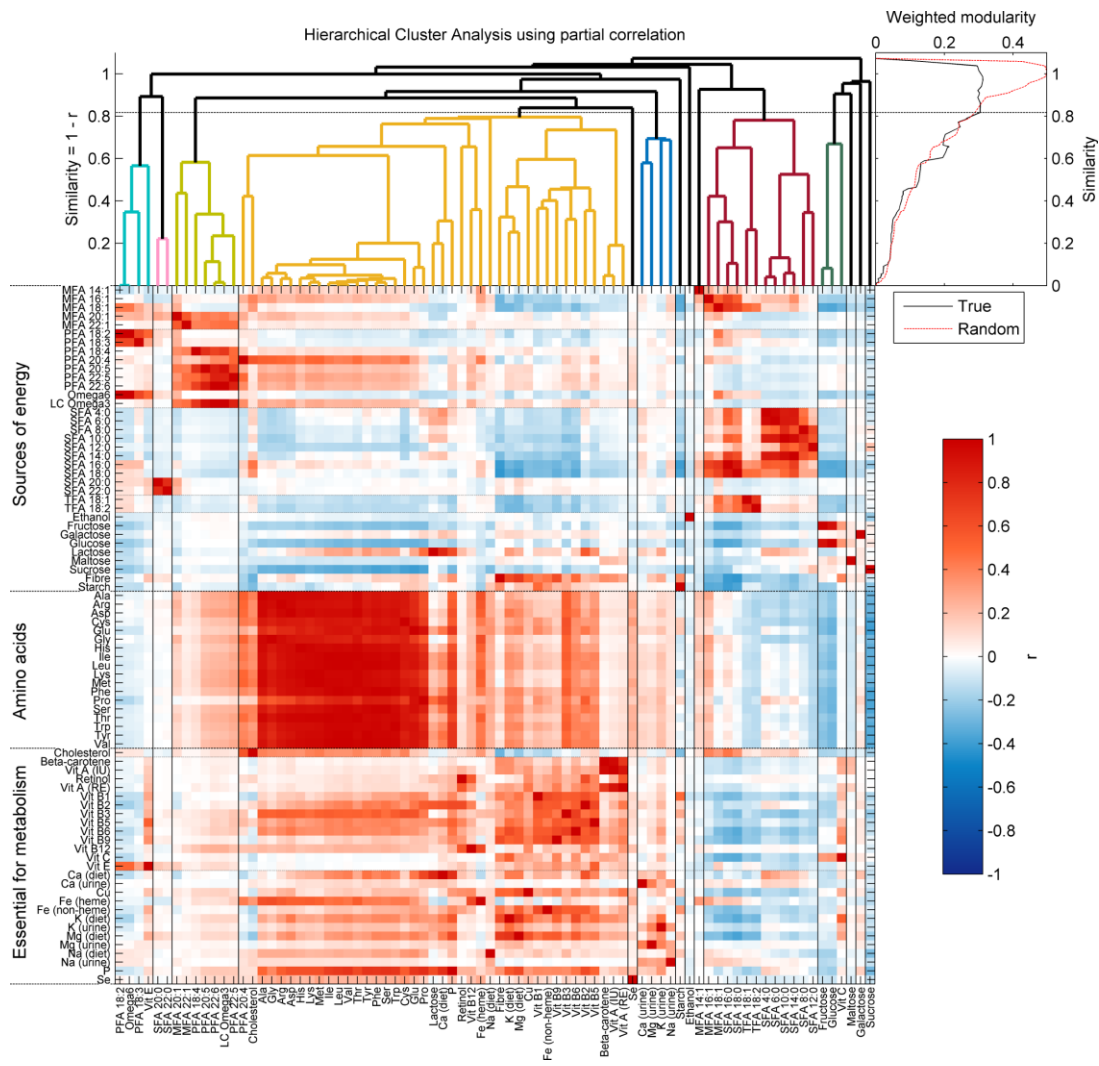

**Supplementary Figure 4. Similarity between nutrients based on the dietary data of the U.S. INTERMAP population by means of partial correlation (adjusted for age, sex and population sample).** The smallest (in absolute sense) partial correlation between two nutrients across both visits was used. All 80 nutrients were included and ordered as in **Supplementary Figure 1** on the y-axis, and ordered based on hierarchical clustering on the x-axis. The optimal number of clusters was found to be 14 and was calculated by comparing the modularity of the network with 1,000 random networks of the same degree structure. The random network with the highest modularity is shown for comparison.

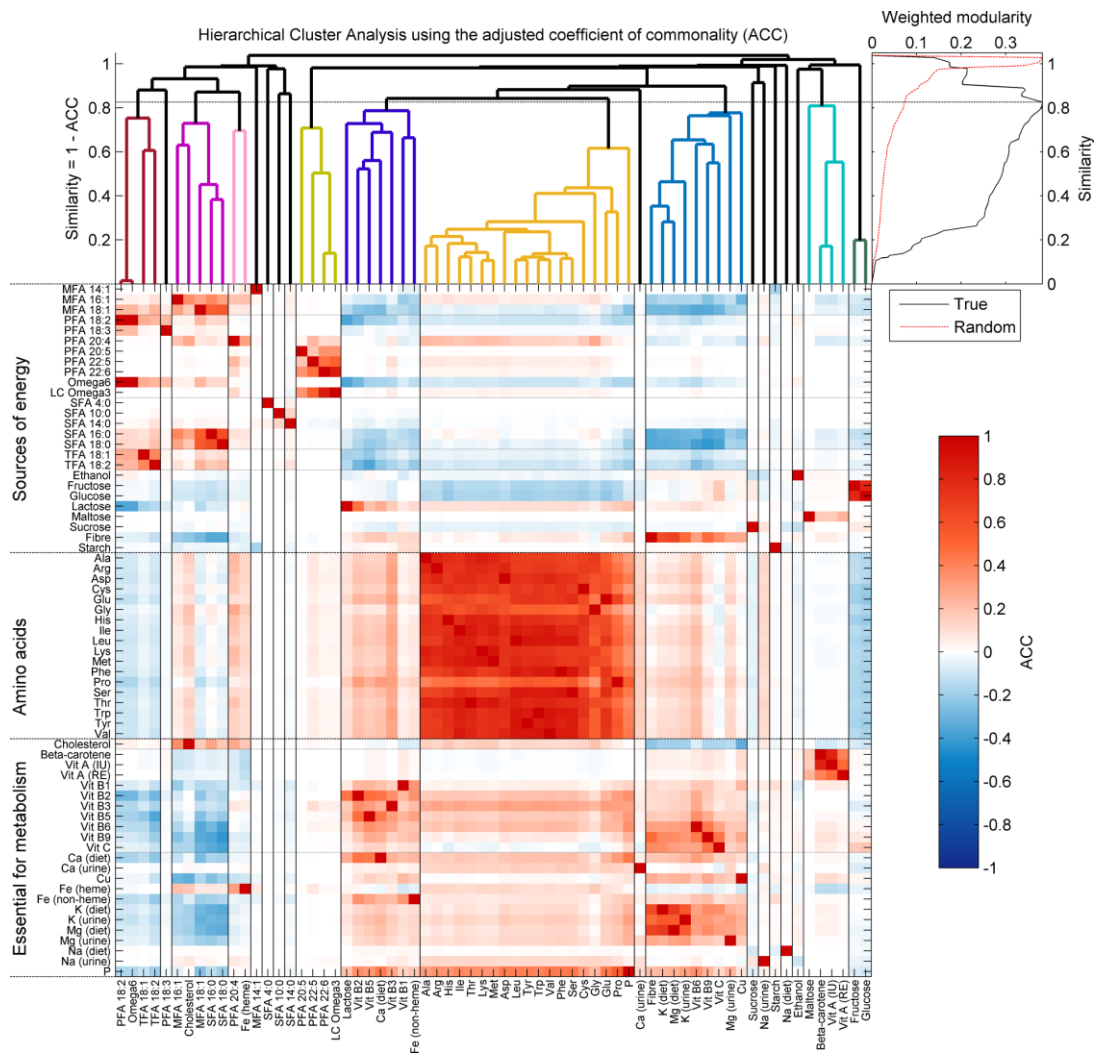

**Supplementary Figure 5. Functional similarities between nutrients based on their urinary metabolic signatures.** Similarity between nutrients is based on their correlation with urinary metabolic profiles in the U.S. INTERMAP population ( $n=1,848$ ) by means of the Adjusted Coefficient of Commonality (ACC, see **Methods**). The 67 nutrients with significant associations for both visits were included and ordered as in **Supplementary Figure 1** on the y-axis, the clustering of dietary data based on the metabolic profiles is shown on the x-axis. The optimal number of clusters was found to be 20 and was calculated by comparing the modularity of the network with 1,000 random networks of the same degree structure. The random network with the highest modularity is shown for comparison. It shows the network structure is distinctly different from random networks of the same degree structure (red line for modularity).

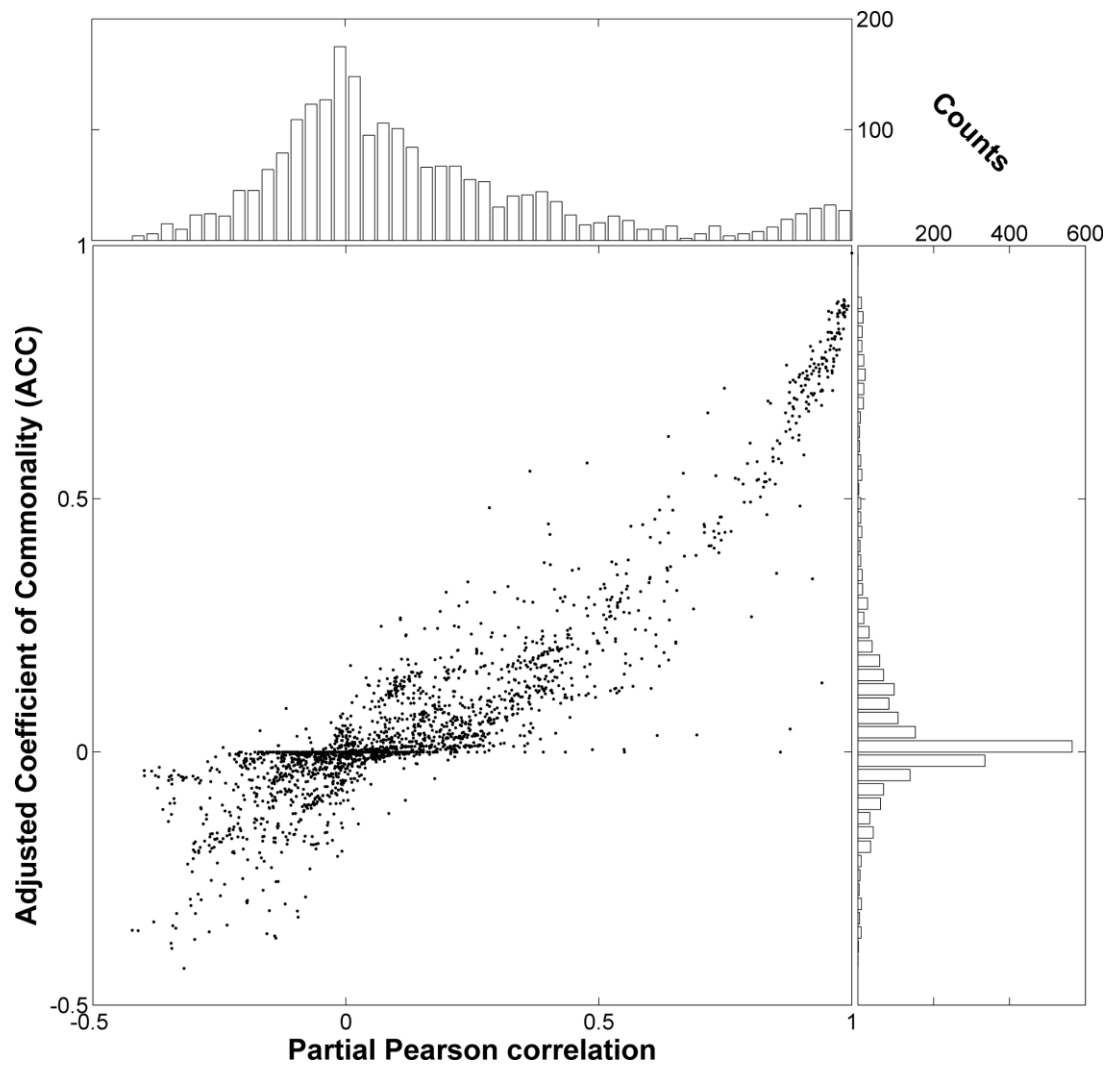

**Supplementary Figure 6. Direct comparison of the partial correlations and adjusted coefficient of commonality (ACC).** Comparison between partial correlation of all nutrients (from **Supplementary Figure 4**, shown on x-axis) and ACC of all nutrient pairs (from **Supplementary Figure 5**, shown on y-axis).

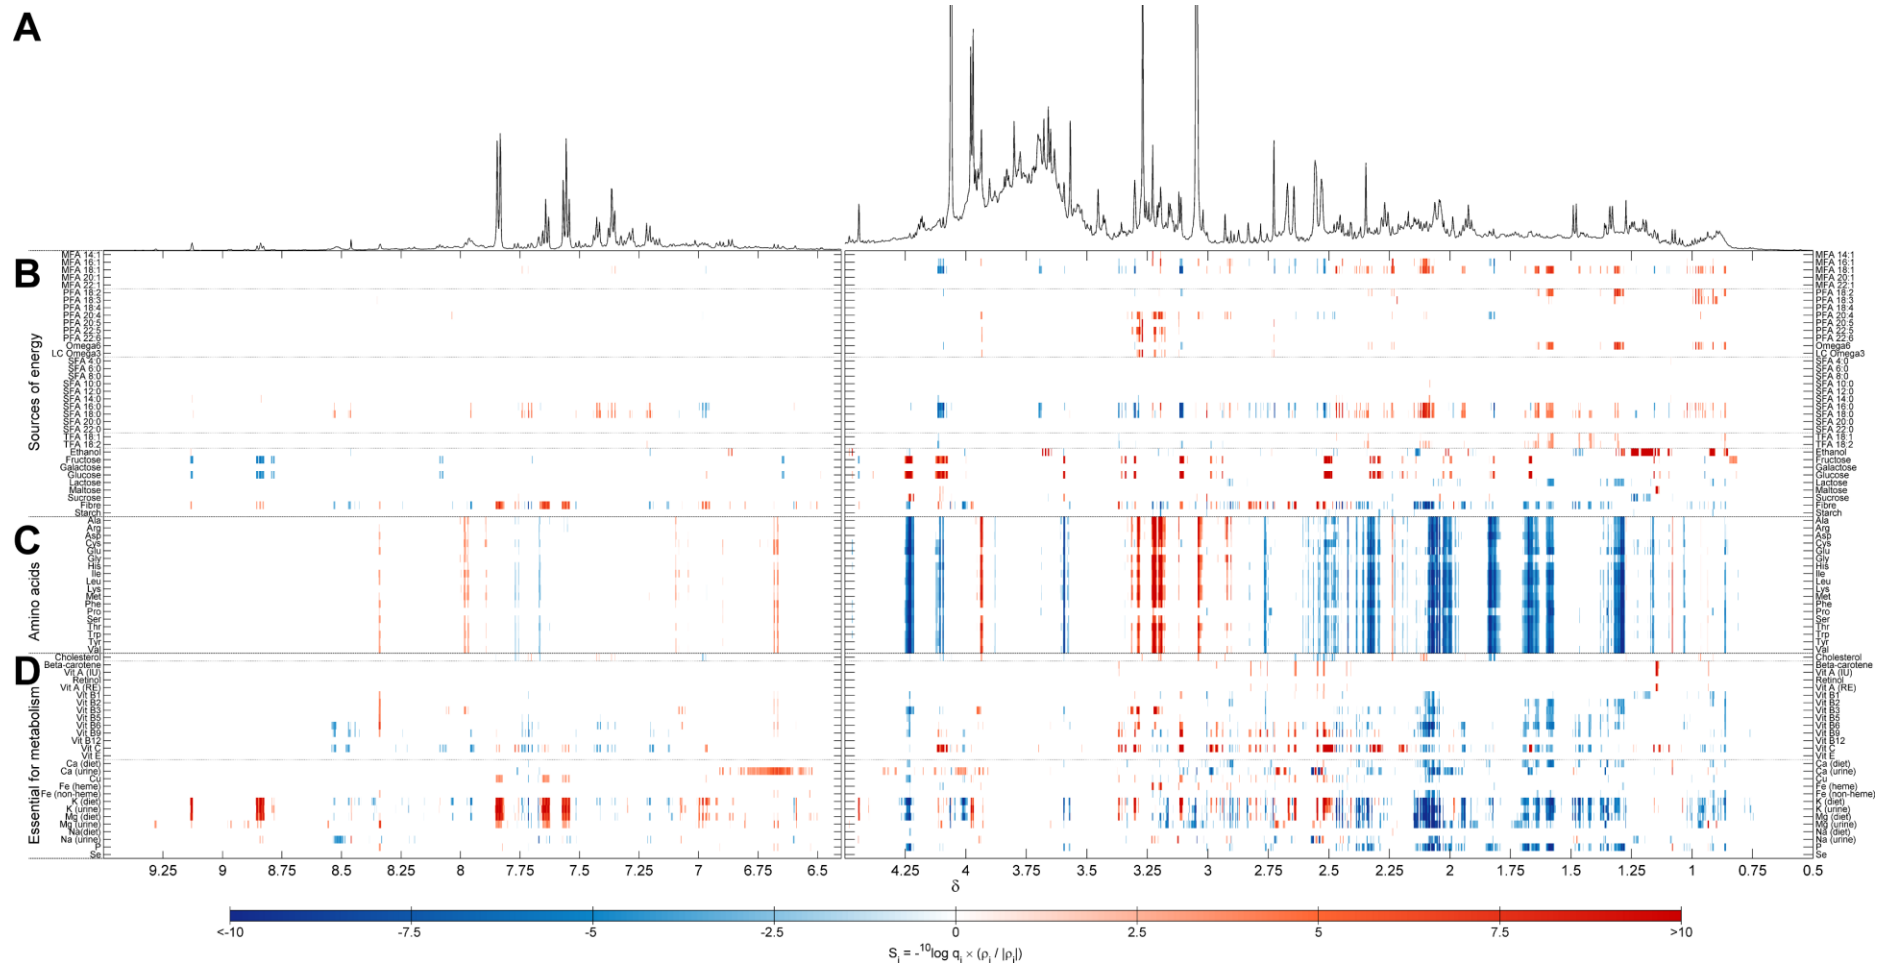

**Supplementary Figure 7. The metabolic influence potential of 80 nutrients in the U.S. INTERMAP population (adjusted for BMI and physical activity in addition to age, sex and population sample as in Supplementary Figure 1). (A) Median  $^1\text{H-NMR}$  spectrum of both visits. (B, C, D) The skyline projection of the significant associations ( $-^{10}\log(q) \times \text{sign}(p)$ ), bounded to limits -10 and 10, where  $q$  is the false discovery rate  $q$ -value) for all nutrients for both visits combined (least significant visit shown for each variable); positive associations are shown in shades of red and inverse associations in shades of blue. (B) Nutrients that are energy providing (fatty acids, alcohol, sugars, fibre, starch), (C) dietary amino acids and (D) are essential for supporting metabolism (cholesterol, vitamins and derivatives, minerals).**



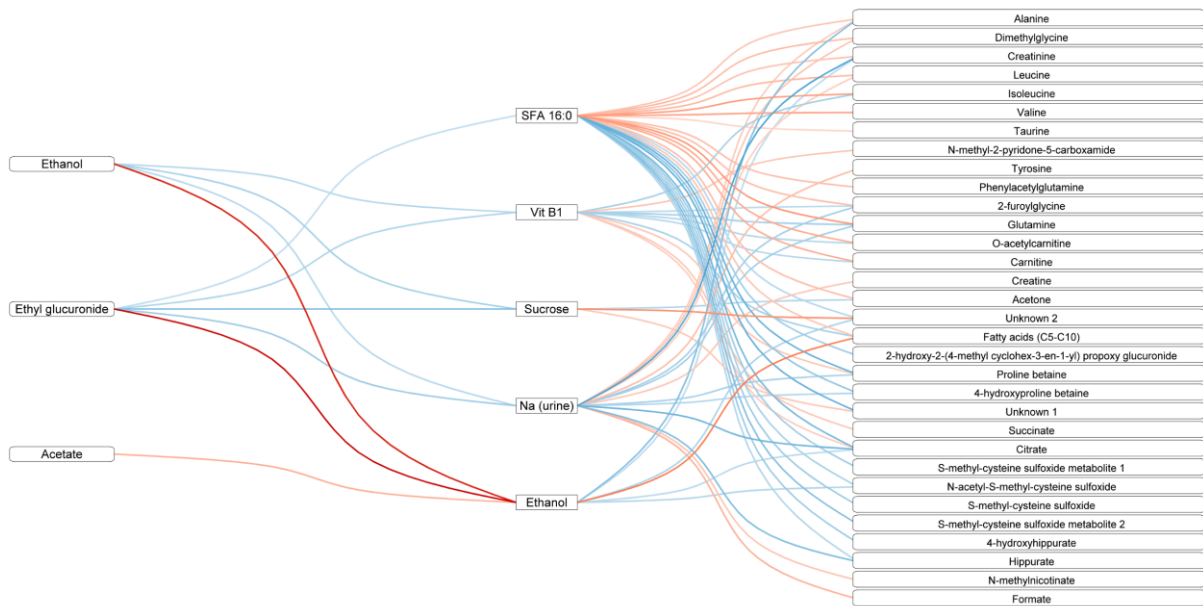

**Supplementary Figure 8. Targeted hierarchical tripartite graph of connectivities of associations from cluster M9.** Cluster M9 consists of urinary ethanol, ethyl glucuronide and acetate and it shows associated nutrients, and metabolites associated with those nutrients. These plots can be explored interactively using the NutriomeXplorer available free of charge.

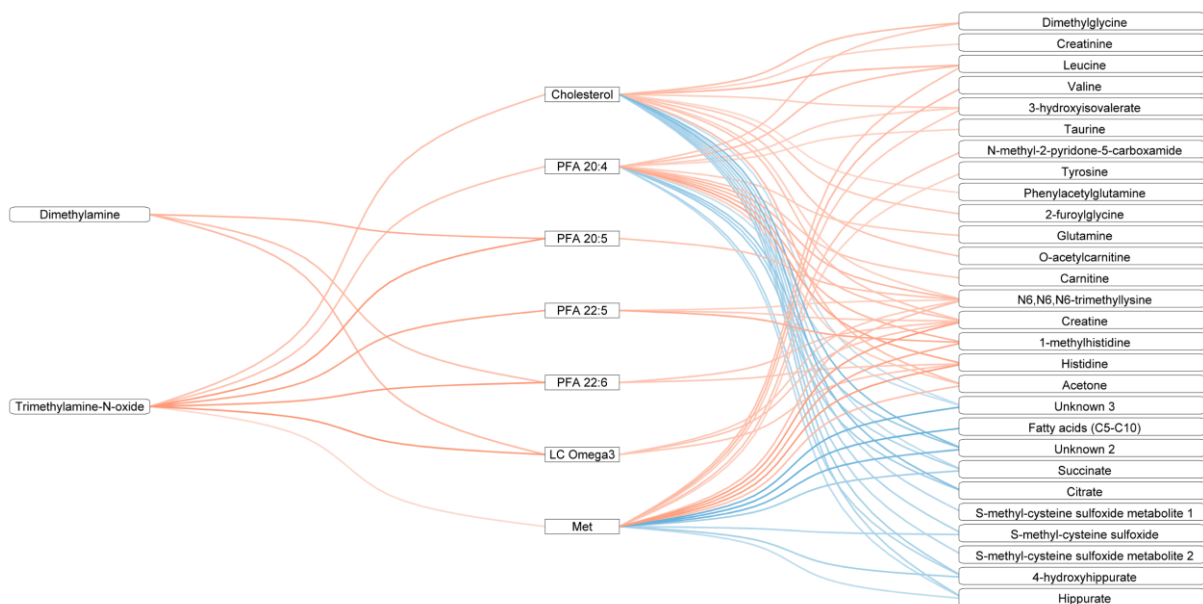

**Supplementary Figure 9. Targeted hierarchical tripartite graph of connectivities of associations from cluster M4.** Cluster M4 consists of urinary trimethylamine-N-oxide and dimethylamine and it shows associated nutrients, and metabolites associated with those nutrients. These plots can be explored interactively using the NutriomeXplorer available free of charge.

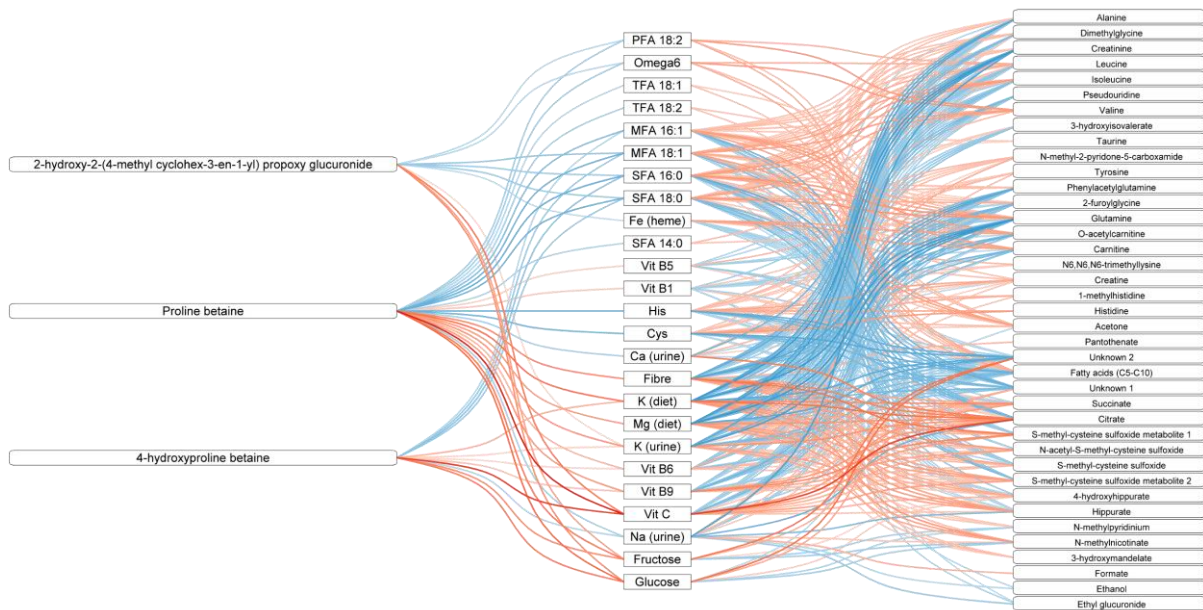

**Supplementary Figure 10. Targeted hierarchical tripartite graph of connectivities of associations of citrus fruit metabolites.** Citrus fruit metabolites include proline betaine, 4-hydroxyproline betaine and 2-hydroxy-2-(4-methyl cyclohex-3-en-1-yl)propoxyglucuronide and it shows associated nutrients, and metabolites associated with those nutrients. These plots can be explored interactively using the NutriomeXplorer available free of charge.

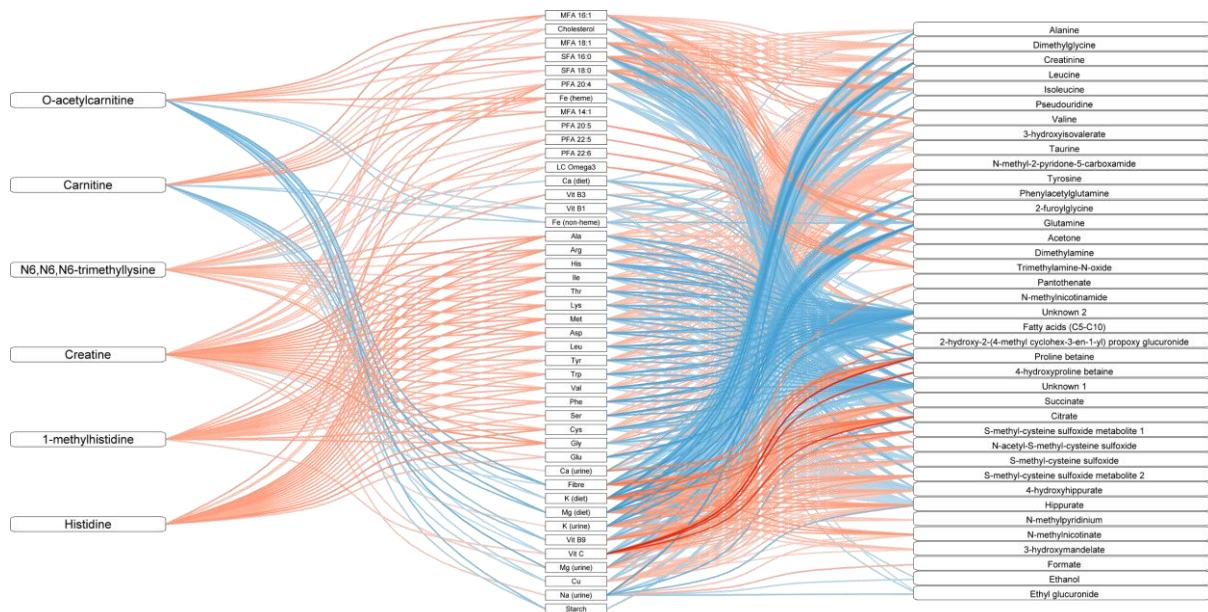

**Supplementary Figure 11. Targeted hierarchical tripartite graph of connectivities of associations from cluster M3.** Metabolites include those that related to meat intake (O-acetylcarnitine, carnitine, N6,N6,N6-trimethyllysine, creatine, 1-methylhistidine and histidine) and it shows associations with nutrients, and metabolites associated with those nutrients. These data can be explored interactively using the NutriomeXplorer available free of charge.

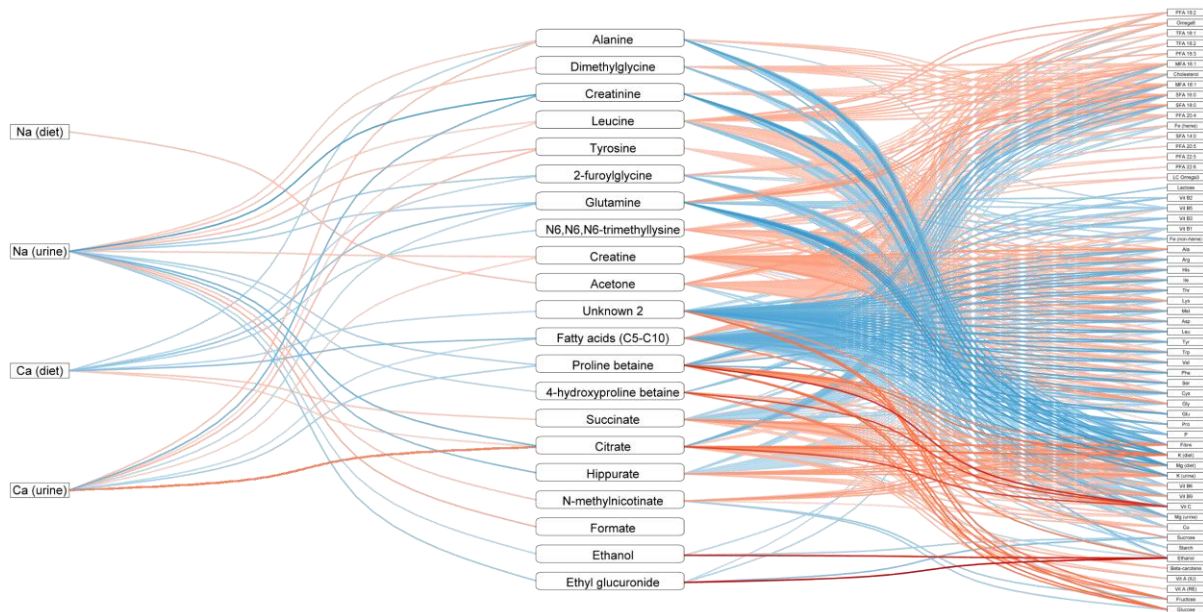

**Supplementary Figure 12. Targeted hierarchical tripartite graph of connectivities of associations for dietary and urinary sodium and calcium.** It shows associated urinary metabolites, and nutrients associated with those metabolites for dietary and urinary sodium and calcium. These plots can be explored interactively using the NutriomeXplorer available free of charge.

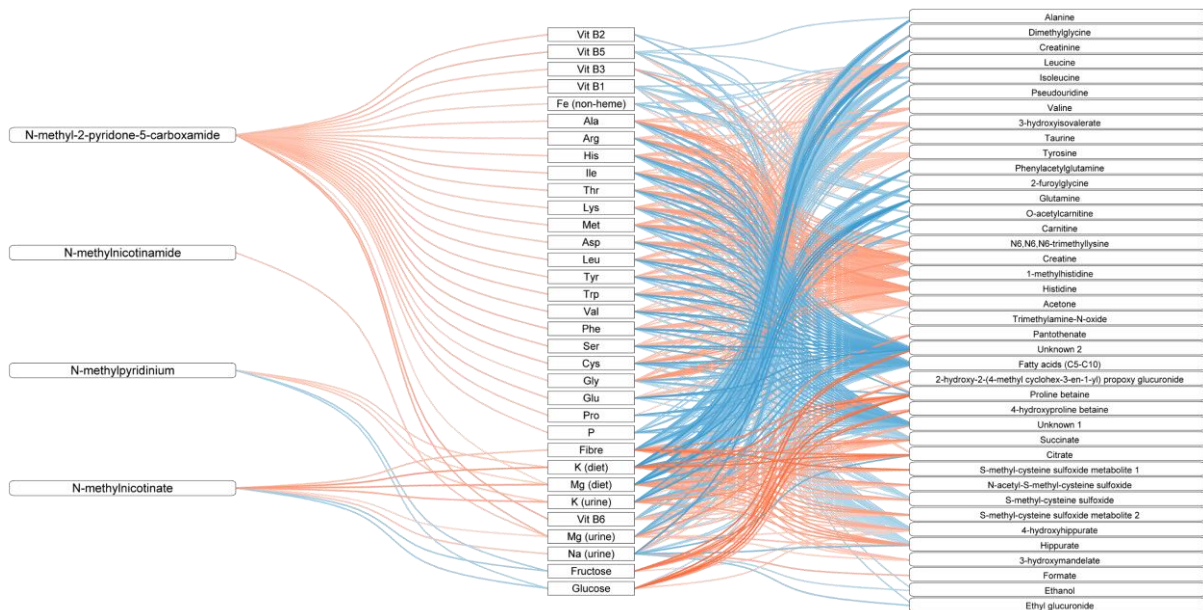

**Supplementary Figure 13. Targeted hierarchical tripartite graph of connectivities of associations of niacin-related metabolites.** Niacin-related metabolites (*N*-methyl-2-pyridone-5-carboxamide, *N*-methylnicotinamide, *N*-methylpyridinium and *N*-methylnicotinate) and their associated nutrients are shown, and metabolites associated with those nutrients. These data can be explored interactively using the NutriomeXplorer available free of charge.





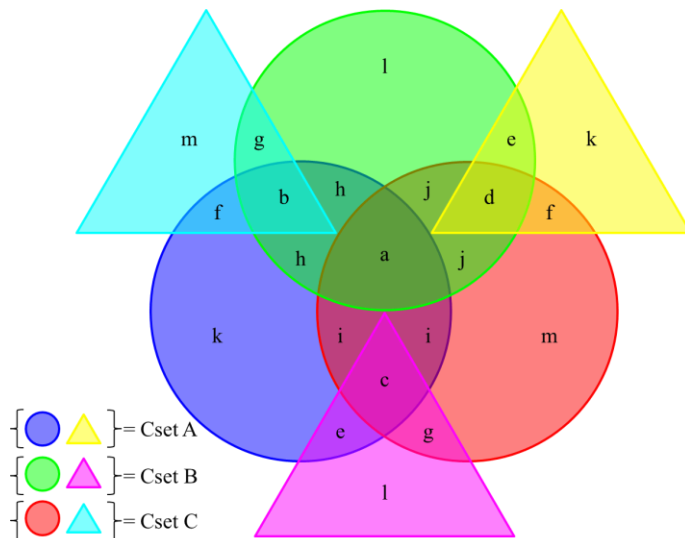

**Supplementary Figure 16. Schematic representation of the overlap between 3 charged binary sets (csets A, B, C).**

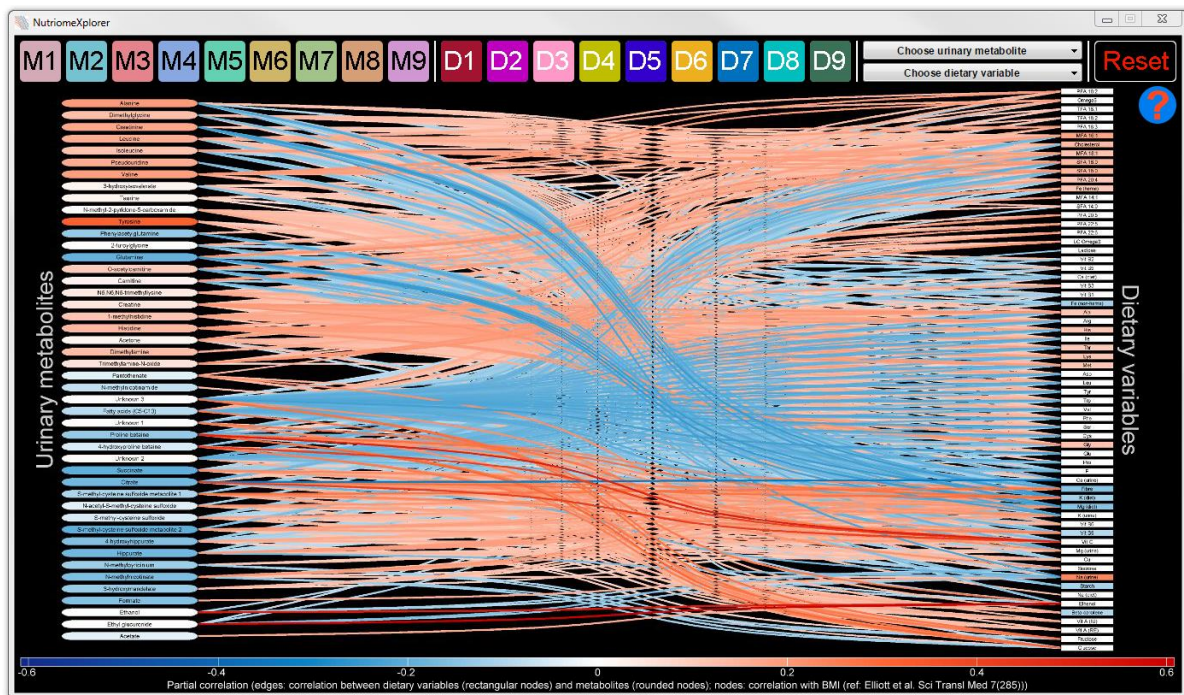

**Supplementary Figure 17. Starting layout of the NutriomeExplorer software. Toolbar includes buttons to display different clusters of metabolites or nutrients as defined in the main text (Figure 2) and Supplementary Information (Supplementary Figure 5).**

## SUPPLEMENTARY TABLES

**Supplementary Table 1. All nutrients with significantly and reproducibly associated urinary metabolites listed and the direction of association for each metabolite.** The significance of each association (as shown in **Figure 2**) is indicated in the table by colours, with black indicating associations with  $q < 10^{-2}$ , green indicating  $q < 10^{-5}$ , orange indicating  $q < 10^{-7.5}$  and red indicating any association more significant than  $q = 10^{-10}$ . 'Unidentified  $^1\text{H-NMR}$  signals' indicates there were significant associations with multiple variables, however none could be (tentatively) identified. 'n.s.' indicates none of the 7,100  $^1\text{H-NMR}$  spectral variables were found to be associated with the nutrient.

| Nutrient                                         | Direction | Associated urinary metabolites                                                                                                                                                                                                 |
|--------------------------------------------------|-----------|--------------------------------------------------------------------------------------------------------------------------------------------------------------------------------------------------------------------------------|
| myristoleic acid (MFA 14:1) (%kcal)              | ↑         | carnitine, O-acetylcarnitine                                                                                                                                                                                                   |
|                                                  | ↓         |                                                                                                                                                                                                                                |
| palmitoleic acid (MFA 16:1) (%kcal)              | ↑         | acetone, glutamine, O-acetylcarnitine, carnitine, Isoleucine, leucine, valine, creatine, dimethylglycine, creatinine, taurine, 2-furoylglycine                                                                                 |
|                                                  | ↓         | unknown (1.82m, 3.52m), citrate, S-methyl-cysteine sulfoxide metabolite (2.80), S-methyl-cysteine sulfoxide, proline betaine, S-methyl-cysteine sulfoxide metabolite (2.76), 4-hydroxyproline betaine, hippurate               |
| oleic acid (MFA 18:1) (%kcal)                    | ↑         | Isoleucine, valine, acetone, fatty acids (C5-C10), leucine, glutamine, dimethylglycine, O-acetylcarnitine, alanine, phenylacetylglutamine, creatinine, carnitine, 2-furoylglycine                                              |
|                                                  | ↓         | proline betaine, citrate, 2-hydroxy-2-(4-methylcyclohex-3-en-1-yl)propoxy glucuronide, unknown (1.82m, 3.52m), 4-hydroxyproline betaine, S-methyl-cysteine sulfoxide metabolite (2.80), unknown (3.59s, 3.89, 4.25), hippurate |
| gadoleic acid (MFA 20:1) (%kcal) <sup>1</sup>    | ↑         | acetone <sup>1</sup> , histidine <sup>1</sup> , leucine <sup>1</sup>                                                                                                                                                           |
|                                                  | ↓         |                                                                                                                                                                                                                                |
| erucic acid (MFA 22:1) (%kcal)                   | ↑         | n.s.                                                                                                                                                                                                                           |
|                                                  | ↓         | n.s.                                                                                                                                                                                                                           |
| linoleic acid (PFA 18:2) (%kcal)                 | ↑         | valine, fatty acids (C5-C10), leucine, acetone                                                                                                                                                                                 |
|                                                  | ↓         | 2-hydroxy-2-(4-methylcyclohex-3-en-1-yl)propoxy glucuronide, proline betaine                                                                                                                                                   |
| linolenic acid (PFA 18:3) (%kcal)                | ↑         | valine, fatty acids (C5-C10), leucine                                                                                                                                                                                          |
|                                                  | ↓         |                                                                                                                                                                                                                                |
| stearidonic acid (PFA 18:4) (%kcal) <sup>1</sup> | ↑         | trimethylamine-N-oxide <sup>1</sup>                                                                                                                                                                                            |
|                                                  | ↓         |                                                                                                                                                                                                                                |
| arachidonic acid (PFA 20:4) (%kcal)              | ↑         | histidine, leucine, glutamine, dimethylglycine, creatine, N6,N6,N6-trimethyllysine, trimethylamine-N-oxide, 3-hydroxyisovalerate, acetone, taurine                                                                             |
|                                                  | ↓         | unknown (1.82m, 3.52m), citrate, succinate, unknown (3.59s, 3.89, 4.25), hippurate, 4-hydroxyhippurate                                                                                                                         |

|                                               |   |                                                                                                                                                                                                                                                                                                                                                                                                               |                      |                                     |
|-----------------------------------------------|---|---------------------------------------------------------------------------------------------------------------------------------------------------------------------------------------------------------------------------------------------------------------------------------------------------------------------------------------------------------------------------------------------------------------|----------------------|-------------------------------------|
| eicosapentaenoic acid (PFA 20:5) (%kcal)      | ↑ | trimethylamine- <i>N</i> -oxide, trimethyllysine                                                                                                                                                                                                                                                                                                                                                              | dimethylamine,       | <i>N</i> 6, <i>N</i> 6, <i>N</i> 6- |
|                                               | ↓ |                                                                                                                                                                                                                                                                                                                                                                                                               |                      |                                     |
| docosapentaenoic acid (PFA 22:5) (%kcal)      | ↑ | trimethylamine- <i>N</i> -oxide, trimethyllysine                                                                                                                                                                                                                                                                                                                                                              | histidine, creatine, | <i>N</i> 6, <i>N</i> 6, <i>N</i> 6- |
|                                               | ↓ |                                                                                                                                                                                                                                                                                                                                                                                                               |                      |                                     |
| docosahexaenoic acid (PFA 22:6) (%kcal)       | ↑ | trimethylamine- <i>N</i> -oxide, trimethyllysine                                                                                                                                                                                                                                                                                                                                                              | creatine, histidine  |                                     |
|                                               | ↓ |                                                                                                                                                                                                                                                                                                                                                                                                               |                      |                                     |
| omega-6 PFA (%kcal)                           | ↑ | valine, fatty acids (C5-C10), leucine, acetone                                                                                                                                                                                                                                                                                                                                                                |                      |                                     |
|                                               | ↓ | 2-hydroxy-2-(4-methylcyclohex-3-en-1-yl)propoxy proline betaine                                                                                                                                                                                                                                                                                                                                               | glucuronide,         |                                     |
| long chain omega-3 PFA (%kcal)                | ↑ | trimethylamine- <i>N</i> -oxide, trimethyllysine, histidine                                                                                                                                                                                                                                                                                                                                                   | creatine,            | <i>N</i> 6, <i>N</i> 6, <i>N</i> 6- |
|                                               | ↓ |                                                                                                                                                                                                                                                                                                                                                                                                               |                      |                                     |
| butyric acid (SFA 4:0) (%kcal)                | ↑ | unidentified <sup>1</sup> H-NMR signals                                                                                                                                                                                                                                                                                                                                                                       |                      |                                     |
|                                               | ↓ | unidentified <sup>1</sup> H-NMR signals                                                                                                                                                                                                                                                                                                                                                                       |                      |                                     |
| caproic acid (SFA 6:0) (%kcal) <sup>1,2</sup> | ↑ | unidentified <sup>1</sup> H-NMR signals <sup>1,2</sup>                                                                                                                                                                                                                                                                                                                                                        |                      |                                     |
|                                               | ↓ |                                                                                                                                                                                                                                                                                                                                                                                                               |                      |                                     |
| caprylic acid (SFA 8:0) (%kcal) <sup>1</sup>  | ↑ | fatty acids (C5-C10) <sup>1</sup>                                                                                                                                                                                                                                                                                                                                                                             |                      |                                     |
|                                               | ↓ |                                                                                                                                                                                                                                                                                                                                                                                                               |                      |                                     |
| capric acid (SFA 10:0) (%kcal)                | ↑ | unidentified <sup>1</sup> H-NMR signals                                                                                                                                                                                                                                                                                                                                                                       |                      |                                     |
|                                               | ↓ | unidentified <sup>1</sup> H-NMR signals                                                                                                                                                                                                                                                                                                                                                                       |                      |                                     |
| lauric acid (SFA 12:0) (%kcal)                | ↑ | n.s.                                                                                                                                                                                                                                                                                                                                                                                                          |                      |                                     |
|                                               | ↓ | n.s.                                                                                                                                                                                                                                                                                                                                                                                                          |                      |                                     |
| myristic acid (SFA 14:0) (%kcal)              | ↑ | isoleucine, glutamine                                                                                                                                                                                                                                                                                                                                                                                         |                      |                                     |
|                                               | ↓ | proline betaine                                                                                                                                                                                                                                                                                                                                                                                               |                      |                                     |
|                                               | ↑ | isoleucine, valine, glutamine, <i>O</i> -acetylcarnitine, carnitine, fatty acids (C5-C10), leucine, alanine, phenylacetylglutamine, acetone, dimethylglycine, creatinine, 2-furoylglycine, taurine                                                                                                                                                                                                            |                      |                                     |
| palmitic acid (SFA 16:0) (%kcal)              | ↓ | unknown (1.82m, 3.52m), citrate, proline betaine, <i>S</i> -methyl-cysteine sulfoxide metabolite (2.80), 2-hydroxy-2-(4-methylcyclohex-3-en-1-yl)propoxy glucuronide, <i>S</i> -methyl-cysteine sulfoxide metabolite (2.76), <i>N</i> -acetyl- <i>S</i> -methyl-cysteine sulfoxide, <i>S</i> -methyl-cysteine sulfoxide, 4-hydroxyproline betaine, 4-hydroxyhippurate, unknown (3.59s, 3.89, 4.25), hippurate |                      |                                     |
|                                               | ↑ | isoleucine, glutamine, fatty acids (C5-C10), valine, 2-furoylglycine, leucine, alanine, phenylacetylglutamine, dimethylglycine, <i>O</i> -acetylcarnitine, carnitine, acetone, creatinine                                                                                                                                                                                                                     |                      |                                     |
| stearic acid (SFA 18:0) (%kcal)               | ↓ | proline betaine, unknown (1.82m, 3.52m), citrate, <i>S</i> -methyl-cysteine sulfoxide metabolite (2.80), 2-hydroxy-2-(4-methylcyclohex-3-en-1-yl)propoxy glucuronide, <i>S</i> -methyl-cysteine sulfoxide metabolite (2.76), <i>N</i> -acetyl- <i>S</i> -methyl-cysteine sulfoxide, <i>S</i> -methyl-cysteine sulfoxide, 4-hydroxyproline betaine, hippurate                                                  |                      |                                     |



|                                                  |   |                                                                                                                                                                                                                                                         |
|--------------------------------------------------|---|---------------------------------------------------------------------------------------------------------------------------------------------------------------------------------------------------------------------------------------------------------|
| arachidic acid (SFA 20:0) (%kcal) <sup>1,2</sup> | ↑ | unidentified <sup>1</sup> H-NMR signals <sup>1,2</sup>                                                                                                                                                                                                  |
|                                                  | ↓ |                                                                                                                                                                                                                                                         |
| behenic acid (SFA 22:0) (%kcal) <sup>1,2</sup>   | ↑ | unidentified <sup>1</sup> H-NMR signals <sup>1</sup> , 4-hydroxyhippurate <sup>2</sup>                                                                                                                                                                  |
|                                                  | ↓ |                                                                                                                                                                                                                                                         |
| trans-octadecenoic acid (TFA 18:1) (%kcal)       | ↑ | fatty acids (C5-C10), glutamine                                                                                                                                                                                                                         |
|                                                  | ↓ | proline betaine                                                                                                                                                                                                                                         |
| trans-octadecadienoic acid (TFA 18:2) (%kcal)    | ↑ | fatty acids (C5-C10), glutamine                                                                                                                                                                                                                         |
|                                                  | ↓ | proline betaine                                                                                                                                                                                                                                         |
| alcohol (%kcal)                                  | ↑ | fatty acids (C5-C10), ethanol, ethyl glucuronide, acetate                                                                                                                                                                                               |
|                                                  | ↓ | Alanine, creatinine, unknown (3.59s, 3.89, 4.25)                                                                                                                                                                                                        |
| fructose (%kcal)                                 | ↑ | 2-hydroxy-2-(4-methylcyclohex-3-en-1-yl)propoxy glucuronide, proline betaine, 4-hydroxyproline betaine, unknown (3.59s, 3.89, 4.25), unknown (1.82m, 3.52m), 4-hydroxyhippurate                                                                         |
|                                                  | ↓ | N-methylpyridinium, N-methylnicotinate                                                                                                                                                                                                                  |
| galactose (%kcal) <sup>1</sup>                   | ↑ | unidentified <sup>1</sup> H-NMR signals <sup>1</sup>                                                                                                                                                                                                    |
|                                                  | ↓ |                                                                                                                                                                                                                                                         |
| glucose (%kcal)                                  | ↑ | 2-hydroxy-2-(4-methylcyclohex-3-en-1-yl)propoxy glucuronide, unknown (1.82m, 3.52m), proline betaine, 4-hydroxyproline betaine, unknown (3.59s, 3.89, 4.25), 4-hydroxyhippurate                                                                         |
|                                                  | ↓ | acetone, N-methylpyridinium, N-methylnicotinate                                                                                                                                                                                                         |
| lactose (%kcal)                                  | ↑ |                                                                                                                                                                                                                                                         |
|                                                  | ↓ | fatty acids (C5-C10)                                                                                                                                                                                                                                    |
| maltose (%kcal)                                  | ↑ | unidentified <sup>1</sup> H-NMR signals                                                                                                                                                                                                                 |
|                                                  | ↓ | unidentified <sup>1</sup> H-NMR signals                                                                                                                                                                                                                 |
| sucrose (%kcal)                                  | ↑ | unknown (3.59s, 3.89, 4.25), unknown (1.82m, 3.52m)                                                                                                                                                                                                     |
|                                                  | ↓ | ethyl glucuronide, ethanol, acetone                                                                                                                                                                                                                     |
| fibre (g/1000kcal)                               | ↑ | succinate, citrate, S-methyl-cysteine sulfoxide metabolite (2.76), N-acetyl-S-methyl-cysteine sulfoxide, S-methyl-cysteine sulfoxide metabolite (2.80), S-methyl-cysteine sulfoxide, hippurate, proline betaine, 4-hydroxyhippurate, N-methylnicotinate |
|                                                  | ↓ | alanine, glutamine, creatinine, O-acetylcarnitine, carnitine, 2-furoylglycine, phenylacetylglutamine, dimethylglycine, fatty acids (C5-C10), isoleucine, leucine, 3-hydroxyisovalerate, unknown (3.59s, 3.89, 4.25), pseudouridine, creatine            |
| starch (%kcal)                                   | ↑ |                                                                                                                                                                                                                                                         |
|                                                  | ↓ | O-acetylcarnitine, acetone, glutamine, carnitine                                                                                                                                                                                                        |
| alanine (%kcal)                                  | ↑ | creatine, histidine, acetone, N6,N6,N6-trimethyllysine, leucine, 3-hydroxyisovalerate, taurine, 1-methylhistidine, N-methyl-2-pyridone-5-carboxamide                                                                                                    |
|                                                  | ↓ | fatty acids (C5-C10), unknown (1.82m, 3.52m), unknown (3.59s, 3.89, 4.25), succinate, hippurate, 4-hydroxyhippurate                                                                                                                                     |



|                       |   |                                                                                                                                                                       |
|-----------------------|---|-----------------------------------------------------------------------------------------------------------------------------------------------------------------------|
| arginine (%kcal)      | ↑ | creatine, <i>N6,N6,N6</i> -trimethyllysine, histidine, acetone, leucine, 3-hydroxyisovalerate, taurine, 1-methylhistidine, <i>N</i> -methyl-2-pyridone-5-carboxamide  |
|                       | ↓ | fatty acids (C5-C10), unknown (1.82m, 3.52m), unknown (3.59s, 3.89, 4.25), succinate, hippurate                                                                       |
| aspartic acid (%kcal) | ↑ | creatine, histidine, acetone, <i>N6,N6,N6</i> -trimethyllysine, leucine, 1-methylhistidine, <i>N</i> -methyl-2-pyridone-5-carboxamide                                 |
|                       | ↓ | fatty acids (C5-C10), unknown (1.82m, 3.52m), unknown (3.59s, 3.89, 4.25), hippurate                                                                                  |
| cysteine (%kcal)      | ↑ | creatine, histidine, leucine, <i>N</i> -methyl-2-pyridone-5-carboxamide, 3-hydroxyisovalerate, acetone, <i>N6,N6,N6</i> -trimethyllysine, tyrosine                    |
|                       | ↓ | fatty acids (C5-C10), unknown (1.82m, 3.52m), unknown (3.59s, 3.89, 4.25), succinate, proline betaine, hippurate, 4-hydroxyhippurate                                  |
| glutamic acid (%kcal) | ↑ | histidine, <i>N</i> -methyl-2-pyridone-5-carboxamide, acetone, creatine, tyrosine                                                                                     |
|                       | ↓ | fatty acids (C5-C10), unknown (3.59s, 3.89, 4.25), unknown (1.82m, 3.52m), 4-hydroxyhippurate                                                                         |
| glycine (%kcal)       | ↑ | creatine, <i>N6,N6,N6</i> -trimethyllysine, histidine, acetone, leucine, 3-hydroxyisovalerate, taurine, <i>N</i> -methyl-2-pyridone-5-carboxamide                     |
|                       | ↓ | unknown (3.59s, 3.89, 4.25), fatty acids (C5-C10), unknown (1.82m, 3.52m), succinate, hippurate                                                                       |
| histidine (%kcal)     | ↑ | creatine, histidine, leucine, acetone, 3-hydroxyisovalerate, <i>N6,N6,N6</i> -trimethyllysine, <i>N</i> -methyl-2-pyridone-5-carboxamide, tyrosine                    |
|                       | ↓ | fatty acids (C5-C10), unknown (1.82m, 3.52m), unknown (3.59s, 3.89, 4.25), succinate, proline betaine, hippurate, 4-hydroxyhippurate                                  |
| isoleucine (%kcal)    | ↑ | creatine, histidine, acetone, <i>N</i> -methyl-2-pyridone-5-carboxamide, leucine, <i>N6,N6,N6</i> -trimethyllysine, tyrosine                                          |
|                       | ↓ | fatty acids (C5-C10), unknown (1.82m, 3.52m), unknown (3.59s, 3.89, 4.25), succinate, hippurate, 4-hydroxyhippurate                                                   |
| leucine (%kcal)       | ↑ | creatine, histidine, acetone, <i>N</i> -methyl-2-pyridone-5-carboxamide, leucine, tyrosine                                                                            |
|                       | ↓ | fatty acids (C5-C10), unknown (1.82m, 3.52m), unknown (3.59s, 3.89, 4.25), succinate, hippurate, 4-hydroxyhippurate                                                   |
| lysine (%kcal)        | ↑ | creatine, histidine, leucine, acetone, <i>N6,N6,N6</i> -trimethyllysine, 3-hydroxyisovalerate, 1-methylhistidine, <i>N</i> -methyl-2-pyridone-5-carboxamide, tyrosine |
|                       | ↓ | fatty acids (C5-C10), unknown (1.82m, 3.52m), unknown (3.59s, 3.89, 4.25), succinate, hippurate, 4-hydroxyhippurate                                                   |

|                             |   |                                                                                                                                                                                                                                                    |
|-----------------------------|---|----------------------------------------------------------------------------------------------------------------------------------------------------------------------------------------------------------------------------------------------------|
| methionine (%kcal)          | ↑ | creatine, histidine, leucine, acetone, N6,N6,N6-trimethyllysine, N-methyl-2-pyridone-5-carboxamide, 3-hydroxyisovalerate, trimethylamine-N-oxide, 1-methylhistidine, tyrosine                                                                      |
|                             | ↓ | fatty acids (C5-C10), unknown (1.82m, 3.52m), unknown (3.59s, 3.89, 4.25), succinate, 4-hydroxyhippurate, hippurate                                                                                                                                |
| phenylalanine (%kcal)       | ↑ | histidine, creatine, acetone, N-methyl-2-pyridone-5-carboxamide, leucine, tyrosine                                                                                                                                                                 |
|                             | ↓ | fatty acids (C5-C10), unknown (1.82m, 3.52m), unknown (3.59s, 3.89, 4.25), succinate, hippurate, 4-hydroxyhippurate                                                                                                                                |
| proline (%kcal)             | ↑ | N-methyl-2-pyridone-5-carboxamide, tyrosine                                                                                                                                                                                                        |
|                             | ↓ | fatty acids (C5-C10), unknown (3.59s, 3.89, 4.25), unknown (1.82m, 3.52m)                                                                                                                                                                          |
| serine (%kcal)              | ↑ | creatine, histidine, acetone, N-methyl-2-pyridone-5-carboxamide, leucine, tyrosine                                                                                                                                                                 |
|                             | ↓ | fatty acids (C5-C10), unknown (1.82m, 3.52m), unknown (3.59s, 3.89, 4.25), hippurate, 4-hydroxyhippurate                                                                                                                                           |
| threonine (%kcal)           | ↑ | creatine, histidine, leucine, acetone, N6,N6,N6-trimethyllysine, N-methyl-2-pyridone-5-carboxamide, 3-hydroxyisovalerate, 1-methylhistidine, tyrosine                                                                                              |
|                             | ↓ | fatty acids (C5-C10), unknown (1.82m, 3.52m), unknown (3.59s, 3.89, 4.25), succinate, hippurate, 4-hydroxyhippurate                                                                                                                                |
| tryptophan (%kcal)          | ↑ | histidine, creatine, N-methyl-2-pyridone-5-carboxamide, leucine, acetone, N6,N6,N6-trimethyllysine, tyrosine                                                                                                                                       |
|                             | ↓ | fatty acids (C5-C10), unknown (1.82m, 3.52m), unknown (3.59s, 3.89, 4.25), succinate, hippurate, 4-hydroxyhippurate                                                                                                                                |
| tyrosine (%kcal)            | ↑ | histidine, creatine, acetone, N-methyl-2-pyridone-5-carboxamide, leucine, tyrosine                                                                                                                                                                 |
|                             | ↓ | fatty acids (C5-C10), unknown (1.82m, 3.52m), unknown (3.59s, 3.89, 4.25), hippurate, 4-hydroxyhippurate                                                                                                                                           |
| valine (%kcal)              | ↑ | histidine, creatine, acetone, N-methyl-2-pyridone-5-carboxamide, leucine, N6,N6,N6-trimethyllysine, tyrosine                                                                                                                                       |
|                             | ↓ | fatty acids (C5-C10), unknown (1.82m, 3.52m), unknown (3.59s, 3.89, 4.25), hippurate, 4-hydroxyhippurate                                                                                                                                           |
| cholesterol (mg/1000kcal)   | ↑ | leucine, acetone, glutamine, dimethylglycine, trimethylamine-N-oxide, 3-hydroxyisovalerate, phenylacetylglutamine, creatine, creatinine, N6,N6,N6-trimethyllysine, O-acetylcarnitine, 2-furoylglycine                                              |
|                             | ↓ | unknown (1.82m, 3.52m), citrate, succinate, S-methyl-cysteine sulfoxide metabolite (2.76), S-methyl-cysteine sulfoxide metabolite (2.80), S-methyl-cysteine sulfoxide, proline betaine, unknown (3.59s, 3.89, 4.25), hippurate, 4-hydroxyhippurate |
| beta-carotene (µg/1000kcal) | ↑ | citrate, S-methyl-cysteine sulfoxide metabolite (2.76), N-acetyl-S-methyl-cysteine sulfoxide, S-methyl-cysteine sulfoxide, succinate, S-methyl-cysteine sulfoxide metabolite (2.80)                                                                |

|                                            |   |                                                                                                                                                                                                                                                                                                                            |
|--------------------------------------------|---|----------------------------------------------------------------------------------------------------------------------------------------------------------------------------------------------------------------------------------------------------------------------------------------------------------------------------|
|                                            | ↓ |                                                                                                                                                                                                                                                                                                                            |
| vitamin A (IU/1000kcal)                    | ↑ | citrate, S-methyl-cysteine sulfoxide metabolite (2.76), S-methyl-cysteine sulfoxide, succinate, N-acetyl-S-methyl-cysteine sulfoxide, S-methyl-cysteine sulfoxide metabolite (2.80)                                                                                                                                        |
|                                            | ↓ |                                                                                                                                                                                                                                                                                                                            |
| retinol (µg/1000kcal)                      | ↑ | n.s.                                                                                                                                                                                                                                                                                                                       |
|                                            | ↓ | n.s.                                                                                                                                                                                                                                                                                                                       |
| vitamin A (RE/1000kcal)                    | ↑ | S-methyl-cysteine sulfoxide metabolite (2.76), succinate, citrate, S-methyl-cysteine sulfoxide metabolite (2.80), S-methyl-cysteine sulfoxide                                                                                                                                                                              |
|                                            | ↓ |                                                                                                                                                                                                                                                                                                                            |
| thiamin (B1) (mg/1000kcal)                 | ↑ | succinate, citrate, proline betaine, N-methyl-2-pyridone-5-carboxamide                                                                                                                                                                                                                                                     |
|                                            | ↓ | fatty acids (C5-C10), isoleucine, ethanol, ethyl glucuronide, glutamine, O-acetylcarnitine, carnitine, 2-furoylglycine                                                                                                                                                                                                     |
| riboflavin (B2) (mg/1000kcal)              | ↑ | N-methyl-2-pyridone-5-carboxamide                                                                                                                                                                                                                                                                                          |
|                                            | ↓ | fatty acids (C5-C10), glutamine, unknown (3.59s, 3.89, 4.25)                                                                                                                                                                                                                                                               |
| niacin (B3) (mg/1000kcal)                  | ↑ | N-methyl-2-pyridone-5-carboxamide                                                                                                                                                                                                                                                                                          |
|                                            | ↓ | unknown (3.59s, 3.89, 4.25), fatty acids (C5-C10), glutamine                                                                                                                                                                                                                                                               |
| pantothenic acid (B5) (mg/1000kcal)        | ↑ | N-methyl-2-pyridone-5-carboxamide, citrate, proline betaine                                                                                                                                                                                                                                                                |
|                                            | ↓ | fatty acids (C5-C10), isoleucine, alanine, glutamine, unknown (3.59s, 3.89, 4.25), 2-furoylglycine                                                                                                                                                                                                                         |
| pyridoxal 5-phosphate (B6) (mg/1000kcal)   | ↑ | citrate, N-methyl-2-pyridone-5-carboxamide, succinate, proline betaine, N-acetyl-S-methyl-cysteine sulfoxide, S-methyl-cysteine sulfoxide metabolite (2.80), 4-hydroxyproline betaine                                                                                                                                      |
|                                            | ↓ | glutamine, fatty acids (C5-C10), isoleucine, alanine, phenylacetylglutamine, 2-furoylglycine, leucine, unknown (3.59s, 3.89, 4.25), pseudouridine                                                                                                                                                                          |
| folate (B9) (µg/1000kcal)                  | ↑ | citrate, S-methyl-cysteine sulfoxide metabolite (2.76), N-acetyl-S-methyl-cysteine sulfoxide, proline betaine, succinate, S-methyl-cysteine sulfoxide metabolite (2.80), S-methyl-cysteine sulfoxide, 4-hydroxyproline betaine                                                                                             |
|                                            | ↓ | glutamine, carnitine, 2-furoylglycine, alanine, creatinine, O-acetylcarnitine, fatty acids (C5-C10), isoleucine, leucine, dimethylglycine, pseudouridine                                                                                                                                                                   |
| cobalamin (B12) (mg/1000kcal) <sup>1</sup> | ↑ | trimethylamine-N-oxide <sup>1</sup>                                                                                                                                                                                                                                                                                        |
|                                            | ↓ |                                                                                                                                                                                                                                                                                                                            |
| vitamin C (mg/1000kcal)                    | ↑ | 2-hydroxy-2-(4-methylcyclohex-3-en-1-yl)propoxy glucuronide, succinate, citrate, S-methyl-cysteine sulfoxide metabolite (2.76), S-methyl-cysteine sulfoxide metabolite (2.80), proline betaine, 4-hydroxyproline betaine, N-acetyl-S-methyl-cysteine sulfoxide, 4-hydroxyhippurate, S-methyl-cysteine sulfoxide, hippurate |

|                                        |   |                                                                                                                                                                                                                                                                                                                                    |
|----------------------------------------|---|------------------------------------------------------------------------------------------------------------------------------------------------------------------------------------------------------------------------------------------------------------------------------------------------------------------------------------|
|                                        | ↓ | glutamine, phenylacetylglutamine, 2-furoylglycine, fatty acids (C5-C10), leucine, alanine, pseudouridine, dimethylglycine, creatinine, O-acetylcarnitine, carnitine                                                                                                                                                                |
| vitamin E (mg/1000kcal) <sup>1,2</sup> | ↑ | fatty acids (C5-C10) <sup>1</sup> , hippurate <sup>1</sup> , unidentified <sup>1</sup> H-NMR signals <sup>2</sup>                                                                                                                                                                                                                  |
|                                        | ↓ | O-acetylcarnitine <sup>1</sup> , carnitine <sup>1</sup>                                                                                                                                                                                                                                                                            |
| calcium (mg/1000kcal)                  | ↑ | succinate, citrate                                                                                                                                                                                                                                                                                                                 |
|                                        | ↓ | fatty acids (C5-C10), alanine, glutamine, unknown (3.59s, 3.89, 4.25), 2-furoylglycine                                                                                                                                                                                                                                             |
| calcium (mmol/24-hr)                   | ↑ | citrate, alanine, tyrosine, pantothenate                                                                                                                                                                                                                                                                                           |
|                                        | ↓ | creatinine, 2-hydroxy-2-(4-methylcyclohex-3-en-1-yl)propoxy glucuronide                                                                                                                                                                                                                                                            |
| copper (mg/1000kcal)                   | ↑ | citrate, S-methyl-cysteine sulfoxide metabolite (2.76), S-methyl-cysteine sulfoxide metabolite (2.80), proline betaine, succinate, N-acetyl-S-methyl-cysteine sulfoxide, S-methyl-cysteine sulfoxide, hippurate                                                                                                                    |
|                                        | ↓ | glutamine, creatinine, O-acetylcarnitine, carnitine, 2-furoylglycine, pseudouridine                                                                                                                                                                                                                                                |
| iron (heme) (mg/1000kcal)              | ↑ | O-acetylcarnitine, carnitine, N6,N6,N6-trimethyllysine, creatine                                                                                                                                                                                                                                                                   |
|                                        | ↓ | fatty acids (C5-C10), 2-hydroxy-2-(4-methylcyclohex-3-en-1-yl)propoxy glucuronide, unknown (1.82m, 3.52m), succinate, citrate, S-methyl-cysteine sulfoxide metabolite (2.76), S-methyl-cysteine sulfoxide                                                                                                                          |
| iron (non-heme) (mg/1000kcal)          | ↑ | citrate, N-methyl-2-pyridone-5-carboxamide                                                                                                                                                                                                                                                                                         |
|                                        | ↓ | glutamine, fatty acids (C5-C10), isoleucine, leucine, O-acetylcarnitine, carnitine                                                                                                                                                                                                                                                 |
| magnesium (mg/1000kcal)                | ↑ | succinate, citrate, S-methyl-cysteine sulfoxide metabolite (2.80), hippurate, N-methylnicotinate, 4-hydroxyhippurate, S-methyl-cysteine sulfoxide metabolite (2.76), N-acetyl-S-methyl-cysteine sulfoxide, S-methyl-cysteine sulfoxide, proline betaine, 3-hydroxymandelate, N-methylpyridinium, N-methyl-2-pyridone-5-carboxamide |
|                                        | ↓ | fatty acids (C5-C10), alanine, phenylacetylglutamine, glutamine, dimethylglycine, creatinine, O-acetylcarnitine, carnitine, unknown (3.59s, 3.89, 4.25), 2-furoylglycine, pseudouridine, isoleucine, leucine, 3-hydroxyisovalerate                                                                                                 |
| magnesium (mmol/24-hr)                 | ↑ | pantothenate, N-methyl-2-pyridone-5-carboxamide, proline betaine, succinate, hippurate, N-methylnicotinamide, 4-hydroxyhippurate, N-methylnicotinate, 3-hydroxymandelate                                                                                                                                                           |
|                                        | ↓ | glutamine, creatinine, leucine, 3-hydroxyisovalerate, alanine, pseudouridine, fatty acids (C5-C10), O-acetylcarnitine, dimethylglycine, unknown (3.59s, 3.89, 4.25), 2-furoylglycine                                                                                                                                               |
| phosphorus (mg/1000kcal)               | ↑ |                                                                                                                                                                                                                                                                                                                                    |
|                                        | ↓ | fatty acids (C5-C10), unknown (3.59s, 3.89, 4.25), alanine, isoleucine, glutamine, 2-furoylglycine                                                                                                                                                                                                                                 |

|                                     |   |                                                                                                                                                                                                                                                                                                                                                                                        |
|-------------------------------------|---|----------------------------------------------------------------------------------------------------------------------------------------------------------------------------------------------------------------------------------------------------------------------------------------------------------------------------------------------------------------------------------------|
| potassium (mg/1000kcal)             | ↑ | 2-hydroxy-2-(4-methylcyclohex-3-en-1-yl)propoxy glucuronide, proline betaine, succinate, citrate, S-methyl-cysteine sulfoxide metabolite (2.76), S-methyl-cysteine sulfoxide metabolite (2.80), hippurate, N-methylnicotinate, N-acetyl-S-methyl-cysteine sulfoxide, S-methyl-cysteine sulfoxide, 4-hydroxyproline betaine, 4-hydroxyhippurate, 3-hydroxymandelate, N-methylpyridinium |
|                                     | ↓ | fatty acids (C5-C10), alanine, phenylacetylglutamine, glutamine, dimethylglycine, creatinine, unknown (3.59s, 3.89, 4.25), 2-furoylglycine, pseudouridine, leucine, isoleucine, 3-hydroxyisovalerate, O-acetylcarnitine, carnitine                                                                                                                                                     |
| potassium (mmol/24-hr)              | ↑ | proline betaine, citrate, hippurate, N-methylnicotinate, succinate, 4-hydroxyhippurate, 2-hydroxy-2-(4-methylcyclohex-3-en-1-yl)propoxy glucuronide, S-methyl-cysteine sulfoxide metabolite (2.80), 4-hydroxyproline betaine, N-methylpyridinium, 3-hydroxymandelate                                                                                                                   |
|                                     | ↓ | fatty acids (C5-C10), glutamine, creatinine, isoleucine, 3-hydroxyisovalerate, unknown (3.59s, 3.89, 4.25), pseudouridine, leucine, alanine, 2-furoylglycine, phenylacetylglutamine, dimethylglycine                                                                                                                                                                                   |
| selenium (µg/1000kcal) <sup>2</sup> | ↑ | creatinine <sup>2</sup> , histidine <sup>2</sup> , acetone <sup>2</sup>                                                                                                                                                                                                                                                                                                                |
|                                     | ↓ | unknown (3.59s, 3.89, 4.25) <sup>2</sup>                                                                                                                                                                                                                                                                                                                                               |
| sodium (mg/1000kcal)                | ↑ | acetone                                                                                                                                                                                                                                                                                                                                                                                |
|                                     | ↓ |                                                                                                                                                                                                                                                                                                                                                                                        |
| sodium (mmol/24-hr)                 | ↑ | formate, tyrosine, alanine, dimethylglycine, N-methylnicotinate                                                                                                                                                                                                                                                                                                                        |
|                                     | ↓ | creatinine, hippurate, ethyl glucuronide, ethanol, phenylacetylglutamine, proline betaine, 2-furoylglycine, 4-hydroxyproline betaine                                                                                                                                                                                                                                                   |

<sup>1</sup> Indicates it was only found significant in the first visit data.

<sup>2</sup> Indicates it was only found significant in the second visit data.

**Supplementary Table 2. A list of identified metabolites, their significant chemical shifts, multiplicities and associated nutrients.** Unknown metabolites are only included if the SubSet Optimization by Reference Matching<sup>1</sup> (STORM) analysis showed clear structural correlations. The significance of each association (as shown in **Figure 2**) is indicated in the table by colours, with black indicating associations with  $q < 10^{-2}$ , green indicating  $q < 10^{-5}$ , orange indicating  $q < 10^{-7.5}$  and red indicating  $q < 10^{-10}$ .

| Metabolite                                                    | Chemical shift (multiplicity)                                         | Associated nutrients                                                                                                                                                                                                                                                                                                                              |
|---------------------------------------------------------------|-----------------------------------------------------------------------|---------------------------------------------------------------------------------------------------------------------------------------------------------------------------------------------------------------------------------------------------------------------------------------------------------------------------------------------------|
| fatty acids (C5-C10)                                          | 0.86 (m), 1.27-1.33 (ms), 1.58 (m), 2.19 (m)                          | ↑ ethanol, MFA 18:1, PFA 18:2, omega-6, SFA 16:0, SFA 18:0, PFA 18:3, TFA 18:1, TFA 18:2<br>↓ Ala, Arg, Asp, Cys, Glu, His, Ile, Leu, Lys, Met, Phe, Pro, Ser, Thr, Trp, Tyr, Val, K (diet), K (urine), Mg (diet), P, Gly, Ca (diet), lactose, fibre, vit B2, vit B6, vit C, vit B1, vit B3, vit B5, vit B9, Fe (heme), Fe (non-heme), Mg (urine) |
| pantothenate                                                  | 0.90 (s), 0.93 (s)                                                    | ↑ Mg (urine), Ca (urine)                                                                                                                                                                                                                                                                                                                          |
| isoleucine                                                    | 0.94 (t), 1.01 (d)                                                    | ↑ MFA 18:1, SFA 16:0, SFA 18:0, MFA 16:1, SFA 14:0<br>↓ K (urine), Mg (diet), fibre, vit B6, K (diet), vit B1, vit B5, vit B9, Fe (non-heme), P                                                                                                                                                                                                   |
| leucine                                                       | 0.96 (2d)                                                             | ↑ MFA 18:1, PFA 18:2, PFA 18:3, omega-6, MFA 16:1, PFA 20:4, SFA 16:0, SFA 18:0, Ala, Cys, Gly, His, Lys, Met, Thr, cholesterol, Arg, Asp, Ile, Leu, Phe, Ser, Trp, Tyr, Val<br>↓ K (diet), Mg (diet), fibre, vit C, K (urine), Mg (urine), vit B6, vit B9, Fe (non-heme)                                                                         |
| valine                                                        | 0.99 (d), 1.04 (d)                                                    | ↑ MFA 18:1, PFA 18:2, PFA 18:3, omega-6, SFA 16:0, SFA 18:0, MFA 16:1                                                                                                                                                                                                                                                                             |
| 2-hydroxy-2-(4-methyl cyclohex-3-en-1-yl) propoxy glucuronide | 1.16 (s), 1.67 (s), 3.52 (2s)                                         | ↑ fructose, glucose, vit C, K (diet), K (urine)<br>↓ MFA 18:1, SFA 16:0, SFA 18:0, PFA 18:2, omega-6, Fe (heme), Ca (urine)                                                                                                                                                                                                                       |
| ethanol                                                       | 1.18 (t), 3.65 (q)                                                    | ↑ ethanol<br>↓ sucrose, vit B1, Na (urine)                                                                                                                                                                                                                                                                                                        |
| ethyl glucuronide                                             | 1.23 (t), 4.48 (d)                                                    | ↑ ethanol<br>↓ sucrose, Na (urine), vit B1                                                                                                                                                                                                                                                                                                        |
| 3-hydroxyisovalerate                                          | 1.27 (s)                                                              | ↑ Ala, Gly, PFA 20:4, Arg, Cys, His, Lys, Met, Thr, cholesterol<br>↓ K (urine), fibre, K (diet), Mg (diet), Mg (urine)                                                                                                                                                                                                                            |
| alanine                                                       | 1.48 (d)                                                              | ↑ SFA 16:0, SFA 18:0, MFA 18:1, Ca (urine)<br>↓ fibre, K (diet), Mg (diet), ethanol, vit B6, vit B9, vit C, Ca (diet), K (urine), Mg (urine), P, vit B5, Na (urine)                                                                                                                                                                               |
| unknown (1)                                                   | 1.82 (m), 3.52 (s)                                                    | ↑ glucose, fructose, sucrose<br>↓ MFA 16:1, SFA 16:0, Ala, Arg, Asp, Cys, His, Ile, Leu, Lys, Met, Phe, Ser, Thr, Trp, Tyr, Val, SFA 18:0, Glu, Gly, Cholesterol, MFA 18:1, PFA 20:4, Pro, Fe (heme)                                                                                                                                              |
| acetate                                                       | 1.92 (s)                                                              | ↑ ethanol                                                                                                                                                                                                                                                                                                                                         |
| phenylacetylglutamine                                         | 1.93 (m), 2.13 (m), 2.27 (t), 3.68 (q), 4.19 (dd), 7.36 (t), 7.43 (t) | ↑ SFA 16:0, SFA 18:0, MFA 18:1, cholesterol<br>↓ K (diet), Mg (diet), fibre, vit C, vit B6, K (urine), Na (urine)                                                                                                                                                                                                                                 |

| Metabolite                             | Chemical shift<br>(multiplicity)                 | Associated nutrients                                                                                                                                                                                                                                            |
|----------------------------------------|--------------------------------------------------|-----------------------------------------------------------------------------------------------------------------------------------------------------------------------------------------------------------------------------------------------------------------|
| glutamine                              | 2.14 (m), 2.46 (m)                               | <p>↑ MFA 16:1, SFA 16:0, SFA 18:0, MFA 18:1, PFA 20:4, cholesterol, SFA 14:0, TFA 18:1, TFA 18:2</p> <p>↓ fibre, vit B9, vit C, K (diet), K (urine), Mg (diet), Mg (urine), vit B6, Cu, Fe (non-heme), starch, vit B1, vit B2, vit B3, vit B5, Ca (diet), P</p> |
| O-acetylcarnitine                      | 2.15 (s), 3.19 (s)                               | <p>↑ MFA 16:1, SFA 16:0, Fe (heme), MFA 18:1, SFA 18:0, MFA 14:1, cholesterol</p> <p>↓ fibre, Mg (diet), starch, vit B9, vit B1, vit C, Cu, Fe (non-heme), K (diet), Mg (urine)</p>                                                                             |
| acetone                                | 2.24 (s)                                         | <p>↑ MFA 16:1, MFA 18:1, Ala, Gly, SFA 16:0, Arg, Asp, His, Ile, Leu, Lys, Met, Phe, Ser, Thr, Tyr, Val, cholesterol, PFA 18:2, PFA 20:4, omega-6, SFA 18:0, Cys, Glu, Trp, Na (diet)</p> <p>↓ glucose, sucrose, starch</p>                                     |
| proline betaine                        | 2.30 (m), 2.50 (m), 3.11 (s), 3.30 (s), 4.10 (m) | <p>↑ fructose, glucose, vit B9, vit C, K (diet), K (urine), fibre, vit B6, Cu, Mg (diet), Mg (urine), vit B1, vit B5</p> <p>↓ MFA 18:1, SFA 16:0, SFA 18:0, MFA 16:1, PFA 18:2, omega-6, SFA 14:0, TFA 18:1, TFA 18:2, Cys, His, cholesterol, Na (urine)</p>    |
| succinate                              | 2.41 (s)                                         | <p>↑ fibre, vit C, K (diet), Mg (diet), vit B9, K (urine), vit B6, Mg (urine), beta-carotene, vit A (IU), vit A (RE), vit B1, Ca (diet), Cu</p> <p>↓ Ala, Gly, Lys, Met, PFA 20:4, Arg, Cys, His, Ile, Leu, Phe, Thr, Trp, cholesterol, Fe (heme)</p>           |
| citrate                                | 2.54 (d), 2.65 (d)                               | <p>↑ fibre, vit B9, vit C, Ca (urine), K (diet), K (urine), Mg (diet), beta-carotene, vit A (IU), vit B6, Cu, vit A (RE), vit B1, vit B5, Ca (diet), Fe (non-heme)</p> <p>↓ SFA 16:0, MFA 16:1, MFA 18:1, SFA 18:0, cholesterol, PFA 20:4, Fe (heme)</p>        |
| dimethylamine                          | 2.72 (s)                                         | <p>↑ PFA 20:5, PFA 22:6, long chain omega-3</p>                                                                                                                                                                                                                 |
| S-methyl-cysteine sulfoxide metabolite | 2.76 (s)                                         | <p>↑ fibre, vit B9, vit C, K (diet), beta-carotene, vit A (IU), Mg (diet), vit A (RE), Cu</p> <p>↓ SFA 16:0, SFA 18:0, MFA 16:1, cholesterol, Fe (heme)</p>                                                                                                     |
| N-acetyl-S-methyl-cysteine sulfoxide   | 2.78 (s)                                         | <p>↑ fibre, vit B9, vit C, K (diet), beta-carotene, Mg (diet), vit A (IU), vit B6, Cu</p> <p>↓ SFA 16:0, SFA 18:0</p>                                                                                                                                           |
| S-methyl-cysteine sulfoxide metabolite | 2.80 (s)                                         | <p>↑ fibre, vit C, K (diet), Mg (diet), vit B9, Cu, beta-carotene, vit A (IU), vit A (RE), vit B6, K (urine)</p> <p>↓ SFA 16:0, SFA 18:0, MFA 16:1, MFA 18:1, cholesterol</p>                                                                                   |
| S-methyl-cysteine sulfoxide            | 2.83 (s)                                         | <p>↑ fibre, K (diet), beta-carotene, vit A (IU), vit B9, vit C, Mg (diet), vit A (RE), Cu</p> <p>↓ MFA 16:1, SFA 16:0, SFA 18:0, cholesterol, Fe (heme)</p>                                                                                                     |



| Metabolite               | Chemical shift<br>(multiplicity)                             | Associated nutrients                                                                                                                                                                                                                                                            |
|--------------------------|--------------------------------------------------------------|---------------------------------------------------------------------------------------------------------------------------------------------------------------------------------------------------------------------------------------------------------------------------------|
| dimethylglycine          | 2.93 (s)                                                     | ↑ MFA 18:1, PFA 20:4, SFA 16:0, SFA 18:0, cholesterol, MFA 16:1, Na (urine)<br>↓ K (diet), Mg (diet), fibre, vit B9, vit C, K (urine), Mg (urine)                                                                                                                               |
| creatine                 | 3.05 (s), 3.93 (s)                                           | ↑ Ala, Arg, Asp, Cys, Gly, His, Ile, Leu, Lys, Met, Thr, Phe, Ser, Trp, Tyr, Val, MFA 16:1, PFA 20:4, PFA 22:5, PFA 22:6, long chain omega-3, Glu, cholesterol, Fe (heme)<br>↓ fibre                                                                                            |
| creatinine               | 3.06 (s), 4.06 (s)                                           | ↑ SFA 16:0, MFA 16:1, MFA 18:1, SFA 18:0, cholesterol<br>↓ fibre, Ca (urine), K (diet), K (urine), Mg (diet), Mg (urine), Na (urine), vit B9, Cu, ethanol, vit C                                                                                                                |
| N6,N6,N6-trimethyllysine | 3.12 (s)                                                     | ↑ Arg, Gly, Ala, PFA 20:4, Asp, Lys, Met, Thr, Fe (heme), PFA 20:5, PFA 22:5, long chain omega-3, Cys, His, Ile, Trp, Val, cholesterol<br>↓ Ca (diet)                                                                                                                           |
| histidine                | 3.14 (dd), 3.25 (dd), 4.00 (dd), 7.09 (s), 7.84 (s)          | ↑ PFA 20:4, Ala, Arg, Asp, Cys, Gly, His, Ile, Leu, Lys, Met, Phe, Thr, Trp, Tyr, Val, Ser, PFA 22:5, Glu, PFA 22:6, long chain omega-3                                                                                                                                         |
| 1-methylhistidine        | 3.21 (2d), 3.29 (2d), 3.69 (s), 3.92 (t), 7.02 (s), 7.85 (s) | ↑ Ala, Arg, Asp, Lys, Met, Thr                                                                                                                                                                                                                                                  |
| carnitine                | 2.44 (dd), 3.23 (s), 3.43 (m)                                | ↑ MFA 14:1, MFA 16:1, SFA 16:0, Fe (heme), SFA 18:0, MFA 18:1<br>↓ fibre, Mg (diet), vit B9, starch, vit B1, vit C, Cu, Fe (non-heme), K (diet)                                                                                                                                 |
| taurine                  | 3.26 (t), 3.44 (t)                                           | ↑ MFA 16:1, PFA 20:4, SFA 16:0, Ala, Arg, Gly                                                                                                                                                                                                                                   |
| trimethylamine-N-oxide   | 3.27 (s)                                                     | ↑ PFA 20:5, PFA 22:5, PFA 22:6, long chain omega-3, PFA 20:4, cholesterol, Met                                                                                                                                                                                                  |
| 4-hydroxyproline betaine | 3.34 (s)                                                     | ↑ glucose, fructose, vit C, K (diet), vit B9, vit B6, K (urine)<br>↓ MFA 18:1, SFA 16:0, SFA 18:0, MFA 16:1, Na (urine)                                                                                                                                                         |
| unknown (2)              | 3.59 (s), 3.89, 4.25                                         | ↑ fructose, glucose, sucrose<br>↓ Ala, Arg, Asp, Cys, Glu, Gly, His, Ile, Leu, Lys, Met, Phe, Pro, Ser, Thr, Trp, Tyr, Val, K (diet), Mg (diet), P, vit B3, K (urine), fibre, MFA 18:1, PFA 20:4, SFA 16:0, ethanol, cholesterol, vit B2, vit B5, vit B6, Ca (diet), Mg (urine) |
| 4-hydroxyhippurate       | 3.94 (s), 6.97 (d), 7.77 (d)                                 | ↑ fibre, vit C, K (diet), Mg (diet), K (urine), fructose, glucose, Mg (urine)<br>↓ SFA 16:0, Met, PFA 20:4, Ala, Cys, Glu, His, Ile, Leu, Lys, Phe, Ser, Thr, Trp, Tyr, Val, cholesterol                                                                                        |
| hippurate                | 3.98 (d), 7.55 (t), 7.65 (t), 7.84 (d)                       | ↑ fibre, K (diet), K (urine), Mg (diet), vit C, Cu, Mg (urine)<br>↓ Na (urine), MFA 16:1, MFA 18:1, PFA 20:4, SFA 16:0, SFA 18:0, Ala, Arg, Asp, Cys, Gly, His, Ile, Leu, Lys, Met, Phe, Ser, Thr, Trp, Tyr, Val, cholesterol                                                   |



| Metabolite                                | Chemical shift<br>(multiplicity)                 | Associated nutrients                                                                                                                                                        |
|-------------------------------------------|--------------------------------------------------|-----------------------------------------------------------------------------------------------------------------------------------------------------------------------------|
| <i>N</i> -methylpyridinium                | 4.40 (s), 8.79 (d)                               | ↑ K (diet), K (urine), Mg (diet)<br>↓ fructose, glucose                                                                                                                     |
| <i>N</i> -methylnicotinate                | 4.45 (s), 8.10 (t), 8.88 (t), 9.11 (s)           | ↑ K (diet), K (urine), Mg (diet), fibre, Na (urine), Mg (urine)<br>↓ fructose, glucose                                                                                      |
| <i>N</i> -methyl nicotinamide             | 4.48 (s), 8.19 (t), 8.90 (d), 8.97 (d), 9.28 (s) | ↑ Mg (urine)                                                                                                                                                                |
| <i>N</i> -methyl-2-pyridone-5-carboxamide | 3.65 (d), 6.67 (d), 7.83 (dd), 8.34 (d)          | ↑ vit B6, Mg (urine), Cys, Glu, Ile, Leu, Met, Phe, Pro, Ser, Thr, Trp, Tyr, Val, vit B2, vit B5, Ala, Arg, Asp, Gly, His, Lys, vit B1, vit B3, Fe (non-heme), Mg (diet), P |
| tyrosine                                  | 6.90 (d), 7.19 (d)                               | ↑ Ca (urine), Na (urine), Cys, Glu, His, Ile, Leu, Lys, Met, Phe, Pro, Ser, Thr, Trp, Tyr, Val                                                                              |
| 3-hydroxymandelate                        | 6.85 (d), 6.92 (t), 6.99 (d), 7.31 (t)           | ↑ K (diet), Mg (diet), K (urine), Mg (urine)                                                                                                                                |
| 2-furoylglycine                           | 6.65 (dd), 7.19 (d), 7.71 (d)                    | ↑ SFA 18:0, SFA 16:0, MFA 16:1, MFA 18:1, cholesterol<br>↓ fibre, K (diet), Mg (diet), vit B9, vit C, vit B6, K (urine), vit B1, vit B5, Ca (diet), Cu, Mg (urine), P       |
| pseudouridine                             | 7.67 (s)                                         | ↓ K (diet), Mg (diet), K (urine), fibre, vit C, Mg (urine), vit B6, vit B9, Cu                                                                                              |
| formate                                   | 8.46 (s)                                         | ↑ Na (urine)                                                                                                                                                                |

**Supplementary Table 3. The partial intraclass correlation (ICC) for each <sup>1</sup>H NMR urinary metabolite and nutrient.** Data shown related to the first and second urine collection data and two dietary records (obtained on average 3 weeks apart), adjusted for age, sex and population sample. The median 3-week partial ICC across all 7,100 <sup>1</sup>H NMR spectral variables for the U.S. population (n=1,848) is 0.325 (IQR: 0.120-0.450). The thick line indicates the variables that have ICCs that fall in the top quartile of <sup>1</sup>H NMR ICCs. 25/46 urinary metabolites (54.4%) (coloured in orange) are in the top quartile of ICCs compared to 17/80 (21.3%) nutrients (coloured in blue).

| Data | Variable                                 | 3-week pICC | P-value                   | 2.5% CI | 97.5% CI |
|------|------------------------------------------|-------------|---------------------------|---------|----------|
| NMR  | Pantothenate                             | 0.793       | < 4.94×10 <sup>-324</sup> | 0.78    | 0.81     |
| NMR  | N-methylnicotinate                       | 0.707       | 1.80×10 <sup>-280</sup>   | 0.68    | 0.73     |
| NMR  | Tyrosine                                 | 0.702       | 8.45×10 <sup>-275</sup>   | 0.68    | 0.72     |
| Diet | Ca (urine)                               | 0.701       | 9.39×10 <sup>-274</sup>   | 0.68    | 0.72     |
| NMR  | N-methyl-2-pyridone-5-carboxamide        | 0.661       | 2.79×10 <sup>-233</sup>   | 0.63    | 0.69     |
| NMR  | Ethyl glucuronide                        | 0.634       | 2.04×10 <sup>-208</sup>   | 0.61    | 0.66     |
| Diet | Ethanol                                  | 0.631       | 1.43×10 <sup>-206</sup>   | 0.60    | 0.66     |
| NMR  | Phenylacetylglutamine                    | 0.623       | 9.93×10 <sup>-200</sup>   | 0.59    | 0.65     |
| NMR  | 3-hydroxyisovalerate                     | 0.611       | 5.13×10 <sup>-190</sup>   | 0.58    | 0.64     |
| Diet | Mg (urine)                               | 0.598       | 6.18×10 <sup>-180</sup>   | 0.57    | 0.63     |
| NMR  | 3-hydroxymandelate                       | 0.596       | 7.77×10 <sup>-179</sup>   | 0.57    | 0.62     |
| NMR  | Dimethylglycine                          | 0.590       | 7.10×10 <sup>-174</sup>   | 0.56    | 0.62     |
| Diet | K (urine)                                | 0.586       | 1.99×10 <sup>-171</sup>   | 0.56    | 0.62     |
| Diet | Fructose                                 | 0.585       | 1.10×10 <sup>-170</sup>   | 0.55    | 0.61     |
| Diet | Lactose                                  | 0.576       | 2.37×10 <sup>-164</sup>   | 0.54    | 0.61     |
| NMR  | Ethanol                                  | 0.569       | 1.33×10 <sup>-159</sup>   | 0.54    | 0.60     |
| NMR  | Alanine                                  | 0.567       | 4.09×10 <sup>-158</sup>   | 0.54    | 0.60     |
| Diet | Glucose                                  | 0.562       | 4.21×10 <sup>-155</sup>   | 0.53    | 0.59     |
| NMR  | Leucine                                  | 0.562       | 9.76×10 <sup>-155</sup>   | 0.53    | 0.59     |
| NMR  | Acetate                                  | 0.559       | 6.04×10 <sup>-153</sup>   | 0.53    | 0.59     |
| NMR  | Glutamine                                | 0.555       | 2.30×10 <sup>-150</sup>   | 0.52    | 0.59     |
| Diet | Fibre                                    | 0.548       | 9.22×10 <sup>-146</sup>   | 0.52    | 0.58     |
| NMR  | Proline betaine                          | 0.544       | 2.71×10 <sup>-143</sup>   | 0.51    | 0.58     |
| NMR  | Hippurate                                | 0.543       | 1.44×10 <sup>-142</sup>   | 0.51    | 0.57     |
| NMR  | Formate                                  | 0.538       | 1.63×10 <sup>-139</sup>   | 0.50    | 0.57     |
| Diet | Mg (diet)                                | 0.529       | 2.08×10 <sup>-134</sup>   | 0.50    | 0.56     |
| NMR  | Creatinine                               | 0.526       | 2.93×10 <sup>-132</sup>   | 0.49    | 0.56     |
| Diet | Ca (diet)                                | 0.513       | 3.57×10 <sup>-125</sup>   | 0.48    | 0.55     |
| Diet | P                                        | 0.510       | 2.07×10 <sup>-123</sup>   | 0.48    | 0.54     |
| Diet | K (diet)                                 | 0.505       | 1.28×10 <sup>-120</sup>   | 0.47    | 0.54     |
| NMR  | N-methylpyridinium                       | 0.493       | 2.54×10 <sup>-114</sup>   | 0.46    | 0.53     |
| Diet | Sucrose                                  | 0.490       | 9.06×10 <sup>-113</sup>   | 0.45    | 0.52     |
| NMR  | Taurine                                  | 0.482       | 9.30×10 <sup>-109</sup>   | 0.45    | 0.52     |
| NMR  | Citrate                                  | 0.481       | 5.00×10 <sup>-108</sup>   | 0.45    | 0.52     |
| NMR  | 4-hydroxyhippurate                       | 0.480       | 1.15×10 <sup>-107</sup>   | 0.44    | 0.51     |
| Diet | MFA 16:1                                 | 0.476       | 1.84×10 <sup>-105</sup>   | 0.44    | 0.51     |
| NMR  | Acetone                                  | 0.472       | 1.14×10 <sup>-103</sup>   | 0.44    | 0.51     |
| Diet | SFA 16:0                                 | 0.471       | 4.46×10 <sup>-103</sup>   | 0.43    | 0.51     |
| NMR  | Creatine                                 | 0.462       | 5.98×10 <sup>-99</sup>    | 0.43    | 0.50     |
| Diet | Vit B6                                   | 0.462       | 9.77×10 <sup>-99</sup>    | 0.43    | 0.50     |
| NMR  | S-methyl-cysteine sulfoxide metabolite 1 | 0.462       | 1.15×10 <sup>-98</sup>    | 0.43    | 0.50     |

| Data | Variable                                                    | 3-week pICC | P-value                | 2.5% CI | 97.5% CI |
|------|-------------------------------------------------------------|-------------|------------------------|---------|----------|
| Diet | Fe (non-heme)                                               | 0.458       | $8.57 \times 10^{-97}$ | 0.42    | 0.49     |
| NMR  | 2-hydroxy-2-(4-methylcyclohex-3-en-1-yl)propoxy glucuronide | 0.448       | $3.07 \times 10^{-92}$ | 0.41    | 0.48     |
| NMR  | Valine                                                      | 0.446       | $2.02 \times 10^{-91}$ | 0.41    | 0.48     |
| Diet | Vit B2                                                      | 0.445       | $4.86 \times 10^{-91}$ | 0.41    | 0.48     |
| Diet | Galactose                                                   | 0.445       | $5.59 \times 10^{-91}$ | 0.41    | 0.48     |
| Diet | PFA 18:3                                                    | 0.437       | $2.67 \times 10^{-87}$ | 0.40    | 0.47     |
| Diet | SFA 18:0                                                    | 0.436       | $8.55 \times 10^{-87}$ | 0.40    | 0.47     |
| NMR  | Isoleucine                                                  | 0.435       | $1.41 \times 10^{-86}$ | 0.40    | 0.47     |
| Diet | Starch                                                      | 0.428       | $1.34 \times 10^{-83}$ | 0.39    | 0.46     |
| Diet | MFA 18:1                                                    | 0.426       | $7.43 \times 10^{-83}$ | 0.39    | 0.46     |
| NMR  | 2-furoylglycine                                             | 0.425       | $2.67 \times 10^{-82}$ | 0.39    | 0.46     |
| NMR  | Histidine                                                   | 0.424       | $7.12 \times 10^{-82}$ | 0.39    | 0.46     |
| Diet | Pro                                                         | 0.420       | $2.74 \times 10^{-80}$ | 0.38    | 0.46     |
| NMR  | Fatty acids (C5-C10)                                        | 0.419       | $1.04 \times 10^{-79}$ | 0.38    | 0.46     |
| NMR  | 4-hydroxyproline betaine                                    | 0.415       | $4.66 \times 10^{-78}$ | 0.38    | 0.45     |
| Diet | VitC                                                        | 0.415       | $5.08 \times 10^{-78}$ | 0.38    | 0.45     |
| Diet | Na (urine)                                                  | 0.412       | $3.95 \times 10^{-77}$ | 0.37    | 0.45     |
| Diet | Ser                                                         | 0.410       | $3.01 \times 10^{-76}$ | 0.37    | 0.45     |
| Diet | Vit B5                                                      | 0.406       | $1.42 \times 10^{-74}$ | 0.37    | 0.44     |
| NMR  | Succinate                                                   | 0.405       | $2.29 \times 10^{-74}$ | 0.37    | 0.44     |
| Diet | Glu                                                         | 0.404       | $6.76 \times 10^{-74}$ | 0.37    | 0.44     |
| Diet | Val                                                         | 0.404       | $7.60 \times 10^{-74}$ | 0.37    | 0.44     |
| Diet | Vit B1                                                      | 0.401       | $1.44 \times 10^{-72}$ | 0.36    | 0.44     |
| Diet | Phe                                                         | 0.399       | $7.45 \times 10^{-72}$ | 0.36    | 0.44     |
| Diet | Tyr                                                         | 0.399       | $7.87 \times 10^{-72}$ | 0.36    | 0.44     |
| NMR  | Unknown 2                                                   | 0.397       | $3.38 \times 10^{-71}$ | 0.36    | 0.43     |
| Diet | Trp                                                         | 0.395       | $1.77 \times 10^{-70}$ | 0.36    | 0.43     |
| Diet | Leu                                                         | 0.395       | $1.95 \times 10^{-70}$ | 0.36    | 0.43     |
| Diet | Ile                                                         | 0.387       | $1.77 \times 10^{-67}$ | 0.35    | 0.43     |
| Diet | Thr                                                         | 0.378       | $2.48 \times 10^{-64}$ | 0.34    | 0.42     |
| Diet | Vit B9                                                      | 0.377       | $9.34 \times 10^{-64}$ | 0.34    | 0.42     |
| NMR  | O-acetylcarnitine                                           | 0.376       | $2.58 \times 10^{-63}$ | 0.34    | 0.41     |
| Diet | SFA 6:0                                                     | 0.374       | $6.41 \times 10^{-63}$ | 0.33    | 0.41     |
| Diet | Met                                                         | 0.373       | $1.56 \times 10^{-62}$ | 0.33    | 0.41     |
| Diet | Cys                                                         | 0.373       | $2.08 \times 10^{-62}$ | 0.33    | 0.41     |
| Diet | Vit B3                                                      | 0.370       | $2.16 \times 10^{-61}$ | 0.33    | 0.41     |
| NMR  | Unknown 1                                                   | 0.366       | $5.20 \times 10^{-60}$ | 0.33    | 0.40     |
| Diet | His                                                         | 0.364       | $1.91 \times 10^{-59}$ | 0.32    | 0.40     |
| Diet | Asp                                                         | 0.364       | $2.33 \times 10^{-59}$ | 0.32    | 0.40     |
| Diet | Lys                                                         | 0.364       | $2.75 \times 10^{-59}$ | 0.32    | 0.40     |
| Diet | Ala                                                         | 0.361       | $2.00 \times 10^{-58}$ | 0.32    | 0.40     |
| Diet | Arg                                                         | 0.351       | $4.15 \times 10^{-55}$ | 0.31    | 0.39     |
| Diet | Gly                                                         | 0.347       | $6.63 \times 10^{-54}$ | 0.31    | 0.39     |
| NMR  | N-acetyl-S-methyl-cysteine sulfoxide metabolite 2           | 0.341       | $6.09 \times 10^{-52}$ | 0.30    | 0.38     |
| Diet | SFA 14:0                                                    | 0.341       | $6.97 \times 10^{-52}$ | 0.30    | 0.38     |
| NMR  | N6,N6,N6-trimethyllysine                                    | 0.341       | $8.15 \times 10^{-52}$ | 0.30    | 0.38     |
| Diet | SFA 4:0                                                     | 0.341       | $9.58 \times 10^{-52}$ | 0.30    | 0.38     |
| Diet | SFA 22:0                                                    | 0.338       | $4.72 \times 10^{-51}$ | 0.30    | 0.38     |

| Data | Variable                                 | 3-week pICC | P-value                | 2.5% CI | 97.5% CI |
|------|------------------------------------------|-------------|------------------------|---------|----------|
| Diet | PFA 18:2                                 | 0.337       | 1.26×10 <sup>-50</sup> | 0.30    | 0.38     |
| Diet | Omega6                                   | 0.337       | 1.40×10 <sup>-50</sup> | 0.30    | 0.38     |
| Diet | SFA 20:0                                 | 0.332       | 4.19×10 <sup>-49</sup> | 0.29    | 0.37     |
| Diet | Cholesterol                              | 0.328       | 8.34×10 <sup>-48</sup> | 0.29    | 0.37     |
| Diet | Vit E                                    | 0.326       | 2.87×10 <sup>-47</sup> | 0.28    | 0.37     |
| Diet | SFA 10:0                                 | 0.323       | 1.37×10 <sup>-46</sup> | 0.28    | 0.36     |
| NMR  | S-methyl-cysteine sulfoxide              | 0.307       | 4.59×10 <sup>-42</sup> | 0.27    | 0.35     |
| Diet | TFA 18:1                                 | 0.279       | 7.76×10 <sup>-35</sup> | 0.24    | 0.32     |
| Diet | Na (diet)                                | 0.272       | 5.21×10 <sup>-33</sup> | 0.23    | 0.31     |
| Diet | TFA 18:2                                 | 0.266       | 1.46×10 <sup>-31</sup> | 0.22    | 0.31     |
| NMR  | S-methyl-cysteine sulfoxide metabolite 2 | 0.263       | 6.33×10 <sup>-31</sup> | 0.22    | 0.30     |
| NMR  | 1-methylhistidine                        | 0.262       | 1.11×10 <sup>-30</sup> | 0.22    | 0.30     |
| Diet | Cu                                       | 0.255       | 3.03×10 <sup>-29</sup> | 0.21    | 0.30     |
| NMR  | Pseudouridine                            | 0.253       | 1.28×10 <sup>-28</sup> | 0.21    | 0.29     |
| Diet | Beta-carotene                            | 0.246       | 2.71×10 <sup>-27</sup> | 0.20    | 0.29     |
| Diet | Vit A (IU)                               | 0.235       | 6.09×10 <sup>-25</sup> | 0.19    | 0.28     |
| NMR  | N-methylnicotinamide                     | 0.233       | 1.94×10 <sup>-24</sup> | 0.19    | 0.28     |
| Diet | PFA 20:4                                 | 0.232       | 2.85×10 <sup>-24</sup> | 0.19    | 0.27     |
| NMR  | Carnitine                                | 0.226       | 4.23×10 <sup>-23</sup> | 0.18    | 0.27     |
| Diet | SFA 12:0                                 | 0.217       | 2.13×10 <sup>-21</sup> | 0.17    | 0.26     |
| Diet | MFA 20:1                                 | 0.216       | 3.18×10 <sup>-21</sup> | 0.17    | 0.26     |
| Diet | Fe (heme)                                | 0.197       | 6.15×10 <sup>-18</sup> | 0.15    | 0.24     |
| Diet | Vit A (RE)                               | 0.191       | 6.46×10 <sup>-17</sup> | 0.15    | 0.23     |
| Diet | PFA 22:6                                 | 0.180       | 3.63×10 <sup>-15</sup> | 0.14    | 0.22     |
| Diet | SFA 8:0                                  | 0.173       | 2.93×10 <sup>-14</sup> | 0.13    | 0.22     |
| Diet | LC Omega3                                | 0.172       | 5.29×10 <sup>-14</sup> | 0.13    | 0.22     |
| Diet | Vit B12                                  | 0.156       | 7.79×10 <sup>-12</sup> | 0.11    | 0.20     |
| Diet | PFA 22:5                                 | 0.150       | 4.90×10 <sup>-11</sup> | 0.10    | 0.19     |
| NMR  | Dimethylamine                            | 0.149       | 6.68×10 <sup>-11</sup> | 0.10    | 0.19     |
| Diet | Maltose                                  | 0.146       | 1.40×10 <sup>-10</sup> | 0.10    | 0.19     |
| Diet | PFA 20:5                                 | 0.139       | 1.07×10 <sup>-9</sup>  | 0.09    | 0.18     |
| Diet | MFA 14:1                                 | 0.132       | 5.72×10 <sup>-9</sup>  | 0.09    | 0.18     |
| Diet | Retinol                                  | 0.111       | 9.23×10 <sup>-7</sup>  | 0.07    | 0.16     |
| NMR  | Trimethylamine-N-oxide                   | 0.093       | 3.29×10 <sup>-5</sup>  | 0.05    | 0.14     |
| Diet | MFA 22:1                                 | 0.074       | 7.47×10 <sup>-4</sup>  | 0.03    | 0.12     |
| Diet | Se                                       | 0.051       | 1.36×10 <sup>-2</sup>  | 0.01    | 0.10     |
| Diet | PFA 18:4                                 | 0.035       | 6.88×10 <sup>-2</sup>  | -0.01   | 0.08     |

**Supplementary Table 4. Full/common names accompanying all metabolites abbreviated shown in the network (Extended Data Figure 2).**

| <b>Abbreviation in network</b> | <b>Full/common name</b>                             |
|--------------------------------|-----------------------------------------------------|
| 1,2-Diacylglycerol             | 1,2-Diacylglycerol                                  |
| 1MeHis                         | 1-Methylhistidine                                   |
| 2,5diOH-PhAc                   | 2,5-Dihydroxyphenylacetate                          |
| 2,5diOH-pyridine               | 2,5-Dihydroxypyridine                               |
| 2Am-adipate                    | 2-Aminoadipate                                      |
| 2Am-adipate 6semial.           | 2-Aminoadipate 6-semialdehyde                       |
| 2Am-benzoate                   | 2-Aminobenzoate                                     |
| 2deH-pantoate                  | 2-Dehydropantoate                                   |
| 2-FuroylGly                    | 2-Furoylglycine                                     |
| 2-Ketovaline                   | 2-Oxoisovalerate                                    |
| 2Me1OHBu-TPP                   | 2-Methyl-1-hydroxybutyl-thiamin diphosphate         |
| 2Me1OHPr-TPP                   | 2-Methyl-1-hydroxypropyl-thiamin diphosphate        |
| 2MeBt-CoA                      | 2-Methylbutanoyl-coenzyme A                         |
| 2O-butyrate                    | 2-Oxobutyrate                                       |
| 2O-glutarate                   | 2-Oxoglutarate                                      |
| 2OHEt-TPP                      | 2-( <i>alpha</i> -Hydroxyethyl)thiamine diphosphate |
| 2-Oxoisocaproate               | 4-Methyl-2-oxopentanoate                            |
| 2PY                            | <i>N</i> -Methyl-2-pyridone-5-carboxamide           |
| 3Cx1OHPrTPP                    | Succinate semialdehyde-thiamin diphosphate          |
| 3cyano-Ala                     | 3-Cyanoalanine                                      |
| 3HIV                           | 3-Hydroxyisovalerate                                |
| 3I-Tyr                         | 3-Iodotyrosine                                      |
| 3Me1OHBu-TPP                   | 3-Methyl-1-hydroxybutyl-thiamin diphosphate         |
| 3Me2O-pentanoate               | 3-Methyl-2-oxopentanoate                            |
| 3MeBt-CoA                      | Isovaleryl-coenzyme A                               |
| 3OH-Asp                        | 3-Hydroxyaspartate                                  |
| 3OH-mandelate                  | 3-Hydroxymandelate                                  |
| 3O-propanoate                  | 3-Oxopropanoate                                     |
| 4-Cresol                       | 4-Cresol                                            |
| 4OH-benzoate                   | 4-Hydroxybenzoate                                   |
| 4OH-benzoyl-CoA                | 4-Hydroxybenzoyl-coenzyme A                         |
| 4OH-hippurate                  | 4-Hydroxyhippurate                                  |
| 4OH-PhAc                       | 4-Hydroxyphenylacetate                              |
| 4OH-Ph-acetal.                 | 4-Hydroxyphenylacetaldehyde                         |
| 4OH-ProBet                     | 4-Hydroxyproline betaine                            |
| 5Ad-2Am-adipate                | 5-Adenylyl-2-aminoadipate                           |
| 5MeTHF                         | 5-Methyltetrahydrofolate                            |
| 6CxLys                         | 2,6-Diaminoheptanedioate                            |
| Ac P                           | Acetyl phosphate                                    |
| Ac-Ad                          | Acetyl adenylate                                    |
| Ac-CoA                         | Acetyl coenzyme A                                   |
| Acetal.                        | Acetaldehyde                                        |
| Acetate                        | Acetate                                             |

| Abbreviation in network    | Full/common name                             |
|----------------------------|----------------------------------------------|
| AcetoAc                    | Acetoacetate                                 |
| AcetoAc-CoA                | Acetoacetyl coenzyme A                       |
| Acetone                    | Acetone                                      |
| ACV                        | <i>delta</i> -(2-Aminoadipyl)cysteinylvaline |
| ADP-ribose                 | Adenosine diphosphate ribose                 |
| Ad-Succ                    | Adenylosuccinate                             |
| Ala                        | Alanine                                      |
| $\alpha$ isoPr-malate      | <i>alpha</i> -Isopropylmalate                |
| AMP                        | Adenosine monophosphate                      |
| Anserine                   | Anserine                                     |
| Arg                        | Arginine                                     |
| Arg-succinate              | Argininosuccinate                            |
| Asp                        | Aspartate                                    |
| Benzoate                   | Benzoate                                     |
| Benzoyl-CoA                | S-Benzoyl-coenzyme A                         |
| $\beta$ -Ala               | <i>beta</i> -Alanine                         |
| $\beta$ -Ribosylnicotinate | Nicotinate ribonucleoside                    |
| Betaine                    | Betaine                                      |
| Bt-CoA                     | Butyryl-coenzyme A                           |
| Butyrate                   | Butyrate                                     |
| C10:0                      | Caprate                                      |
| C5:0                       | Valerate                                     |
| C6:0                       | Caproate                                     |
| C7:0                       | Enanthate                                    |
| C8:0                       | Caprylate                                    |
| C9:0                       | Pelargonate                                  |
| Carbamoyl P                | Carbamoyl phosphate                          |
| Carnitine                  | Carnitine                                    |
| Carnosine                  | Carnosine                                    |
| Catechol                   | 1,2-Dihydroxybenzene                         |
| CDP-diacylglycerol         | Cytidine-diphosphate diacylglycerol          |
| Choline                    | Choline                                      |
| Chorismate                 | Chorismate                                   |
| Citrate                    | Citrate                                      |
| Citrulline                 | Citrulline                                   |
| Citryl-CoA                 | Citryl-coenzyme A                            |
| CMP                        | Cytidine-5-monophosphate                     |
| CoA                        | Coenzyme A                                   |
| Creatine                   | Creatine                                     |
| Creatinine                 | Creatinine                                   |
| Cys                        | Cysteine                                     |
| CysGly                     | Cysteinylglycine                             |
| Cystathionine              | Cystathionine                                |
| Deamido-NAD                | Nicotinic acid adenine dinucleotide          |
| deH-Ala                    | Dehydroalanine                               |

| Abbreviation in network         | Full/common name                                                  |
|---------------------------------|-------------------------------------------------------------------|
| $\delta$ 1-Piperideine-6Cxate   | <i>delta</i> 1-Piperideine-6carboxylate                           |
| DeP-CoA                         | Dephosphocoenzyme A                                               |
| diH-LipE                        | Enzyme <i>N</i> 6-(dihydrolipoyl)lysine                           |
| DiiodoTyr                       | 3,5-Diiodotyrosine                                                |
| DMA                             | Dimethylamine                                                     |
| DMA-CoA                         | 3-Methylcrotonyl-coenzyme A                                       |
| DMG                             | Dimethylglycine                                                   |
| EA                              | Ethanolamine                                                      |
| EA P                            | Phosphoethanolamine                                               |
| Ethanol                         | Ethanol                                                           |
| Ethyl glucuronide               | Ethyl glucuronide                                                 |
| FA                              | Fatty acid                                                        |
| Formate                         | Formate                                                           |
| Fuma-acetoAc                    | 4-Fumarylacetoacetate                                             |
| Fumarate                        | Fumarate                                                          |
| GABA                            | <i>gamma</i> -Aminobutyric acid                                   |
| $\gamma$ GluCys                 | <i>gamma</i> -Glutamylcysteine                                    |
| $\gamma$ Glu-S-(hercyn-2-yl)CSO | <i>gamma</i> -Glutamyl-S-(hercyn-2-yl)cysteine sulfoxide          |
| Gln                             | Glutamine                                                         |
| Glu                             | Glutamate                                                         |
| Glucuronate                     | Glucuronate                                                       |
| Gly                             | Glycine                                                           |
| Glyoxylate                      | Glyoxylate                                                        |
| GSH                             | Glutathione                                                       |
| GuanidinoAc                     | Guanidinoacetate                                                  |
| Hercynine                       | <i>N</i> alpha, <i>N</i> alpha, <i>N</i> alpha-Trimethylhistidine |
| Hippurate                       | Hippurate                                                         |
| His                             | Histidine                                                         |
| HMG-CoA                         | Hydroxymethylglutaroyl coenzyme A                                 |
| Ile                             | Isoleucine                                                        |
| IMP                             | Inosine monophosphate                                             |
| IsoBt-CoA                       | 2-Methylpropionyl-coenzyme A                                      |
| Isocitrate                      | Isocitrate                                                        |
| Lactate                         | Lactate                                                           |
| Lecithin                        | Phosphatidylcholine                                               |
| Leu                             | Leucine                                                           |
| LipE                            | Enzyme <i>N</i> 6-(lipoyl)lysine                                  |
| Lys                             | Lysine                                                            |
| Malate                          | Malate                                                            |
| Malonyl-CoA                     | Malonyl coenzyme A                                                |
| Malyl-CoA                       | Malyl-coenzyme A                                                  |
| Me-corrinoid                    | Methylcorrinoid                                                   |
| MeOH                            | Methanol                                                          |
| Methanal                        | Methanal                                                          |
| Methyl-CoM                      | Methylcoenzyme M                                                  |

| <b>Abbreviation in network</b> | <b>Full/common name</b>                              |
|--------------------------------|------------------------------------------------------|
| MMA                            | Methylamine                                          |
| NAAG                           | <i>N</i> -Acetylaspartylglutamate                    |
| NAAGG                          | <i>N</i> -Acetylaspartylglutamylglutamate            |
| NAcAsp                         | <i>N</i> -Acetylaspartate                            |
| NAc-citrulline                 | <i>N</i> -Acetylcitrulline                           |
| NACOrn                         | <i>N</i> -Acetylornithine                            |
| NAcSMCSO                       | <i>N</i> -Acetyl- <i>S</i> -methylcysteine sulfoxide |
| NAD                            | Nicotinamide adenine dinucleotide                    |
| Niacin                         | Nicotinate                                           |
| Nicotinamide                   | Nicotinamide                                         |
| Nicotinate ribonucleotide      | Nicotinate ribonucleotide                            |
| NMe-GABA                       | 4-Methylaminobutyrate                                |
| NMeGlu                         | <i>N</i> -Methylglutamate                            |
| NMe-nicotinamide               | <i>N</i> -Methylnicotinamide                         |
| NMe-pyridinium                 | <i>N</i> -Methylpyridinium                           |
| NMNA                           | <i>N</i> -Methylnicotinate, trigonelline             |
| OAc-carnitine                  | <i>O</i> -Acetylcarnitine                            |
| OAcSer                         | <i>O</i> -Acetylserine                               |
| Orn                            | Ornithine                                            |
| OSucc-hSer                     | <i>O</i> -Succinylhomoserine                         |
| OxaloAc                        | Oxaloacetate                                         |
| Oxalyl-CoA                     | Oxalyl-coenzyme A                                    |
| PAG                            | Phenylacetylglutamine                                |
| Palmitate                      | Palmitate                                            |
| Palmitoyl-CoA                  | Palmitoyl-coenzyme A                                 |
| Pantetheine 4P                 | Phosphopantetheine                                   |
| Pantothenate                   | Pantothenate                                         |
| Pantothenate 4P                | 4-Phosphopantothenate                                |
| Pantothenoyl-Cys 4P            | 4-Phosphopantothenoylcysteine                        |
| PhAc                           | Phenylacetate                                        |
| Phenol                         | Hydroxybenzene                                       |
| PLP                            | Pyridoxal 5-phosphate                                |
| Pp-Ad                          | Propionyladenylate                                   |
| Pp-CoA                         | Propionyl coenzyme A                                 |
| ProBet                         | Proline betaine                                      |
| Propanoate                     | Propanoate                                           |
| Psi                            | Pseudouridine                                        |
| Psi 5P                         | Pseudouridine 5-phosphate                            |
| PtdEA                          | Phosphatidylethanolamine                             |
| Ptd-inositol                   | Phosphatidylinositol                                 |
| PtdSer                         | Phosphatidylserine                                   |
| Pyruvate                       | Pyruvate                                             |
| Quinolate                      | Pyridine-2,3-dicarboxylate                           |
| Ribose                         | Ribose                                               |
| Ribose 5P                      | Ribose 5-phosphate                                   |



| <b>Abbreviation in network</b> | <b>Full/common name</b>                  |
|--------------------------------|------------------------------------------|
| Ribosylamine 5P                | 5-Phosphoribosylamine                    |
| Ribulose 5P                    | Ribulose 5-phosphate                     |
| S(2MeBt)diH-LipE               | S-(2-Methylbutanoyl)-dihydrolipoamide-E  |
| S(2MePp)diH-LipE               | S-(2-Methylpropionyl)-dihydrolipoamide-E |
| S(3MeBt)diH-LipE               | S-(3-Methylbutanoyl)-dihydrolipoamide-E  |
| S-(Hercyn-2-yl)-CSO            | S-(Hercyn-2-yl)cysteine sulfoxide        |
| Saccharopine                   | Saccharopine                             |
| Sarcosine                      | Sarcosine                                |
| Ser                            | Serine                                   |
| SMCSO                          | S-methylcysteine sulfoxide               |
| SMCSO-M1                       | S-methylcysteine sulfoxide metabolite 1  |
| SMCSO-M2                       | S-methylcysteine sulfoxide metabolite 2  |
| S-Succ-diH-LipE                | S-Succinyldihydrolipoamide-E             |
| Succ semial.                   | Succinate semialdehyde                   |
| Succ-CoA                       | Succinyl coenzyme A                      |
| Succinate                      | Succinate                                |
| Sulfoacetal.                   | Sulfoacetaldehyde                        |
| Taurine                        | Taurine                                  |
| Thr                            | Threonine                                |
| TMA                            | Trimethylamine                           |
| TMAO                           | Trimethylamine- <i>N</i> -oxide          |
| TPP                            | Thiamin diphosphate                      |
| TriMe-Lys                      | <i>N6,N6,N6</i> -Trimethyllysine         |
| Tyr                            | Tyrosine                                 |
| Tyramine                       | Tyramine                                 |
| UDP                            | Uridine 5-diphosphate                    |
| UDPglucose                     | Uridine diphosphate glucose              |
| UDPglucuronate                 | Uridine diphosphate glucuronate          |
| UDP-xylose                     | Uridine diphosphate xylose               |
| UMP                            | Uridine monophosphate                    |
| Uracil                         | Uracil                                   |
| Urea                           | Urea                                     |
| Ureidoglycolate                | Ureidoglycolate                          |
| Uridine                        | Uridine                                  |
| Val                            | Valine                                   |

**Supplementary Table 5. Model statistics for prediction of healthy and unhealthy dietary patterns in the U.S. population over a 3-week period.** The top and bottom quartiles of the NRF9.3 index, DASH-nutrient, OMNIHEART-carbohydrate, OMNIHEART-MFA and OMNIHEART-protein scores for the U.S. population were used to define healthy and unhealthy dietary patterns in this population. The 46 metabolites identified here were used to classify the dietary patterns in the U.S. data, from the first urine collection, using a Monte-Carlo Cross-Validated (MCCV) Projections to Latent Structures model. This model was used to classify the same U.S. population at the second urine collection (test data) based on their urinary data alone.

| Dietary score <sup>a</sup>          | Data                                        | R <sup>2</sup> <sub>γ</sub> <sup>b</sup> | Q <sup>2</sup> <sub>γ</sub> <sup>b</sup> | AUROC <sup>b</sup> | TPR <sup>b</sup> | TNR <sup>b</sup> | Accuracy <sup>b</sup> |
|-------------------------------------|---------------------------------------------|------------------------------------------|------------------------------------------|--------------------|------------------|------------------|-----------------------|
| <b>Nutrient Rich Food index</b>     | Training model (U.S. 1 <sup>st</sup> urine) | 0.43                                     |                                          | 0.89               | 0.78             | 0.84             | 81.2%                 |
|                                     | Test data (U.S. 2 <sup>nd</sup> urine)      |                                          | 0.40                                     | 0.88               | 0.76             | 0.84             | 79.9%                 |
| <b>DASH-nutrient score</b>          | Training model (U.S. 1 <sup>st</sup> urine) | 0.30                                     |                                          | 0.83               | 0.79             | 0.72             | 74.9%                 |
|                                     | Test data (U.S. 2 <sup>nd</sup> urine)      |                                          | 0.27                                     | 0.81               | 0.75             | 0.70             | 71.8%                 |
| <b>OMNIHEART-carbohydrate score</b> | Training model (U.S. 1 <sup>st</sup> urine) | 0.33                                     |                                          | 0.85               | 0.76             | 0.78             | 77.1%                 |
|                                     | Test data (U.S. 2 <sup>nd</sup> urine)      |                                          | 0.30                                     | 0.83               | 0.75             | 0.77             | 75.6%                 |
| <b>OMNIHEART-MFA score</b>          | Training model (U.S. 1 <sup>st</sup> urine) | 0.33                                     |                                          | 0.85               | 0.80             | 0.73             | 76.1%                 |
|                                     | Test data (U.S. 2 <sup>nd</sup> urine)      |                                          | 0.31                                     | 0.83               | 0.77             | 0.72             | 74.3%                 |
| <b>OMNIHEART-protein score</b>      | Training model (U.S. 1 <sup>st</sup> urine) | 0.31                                     |                                          | 0.84               | 0.76             | 0.75             | 75.6%                 |
|                                     | Test data (U.S. 2 <sup>nd</sup> urine)      |                                          | 0.29                                     | 0.83               | 0.75             | 0.74             | 74.2%                 |

a The cut-offs for the bottom and top quartiles for the U.S. population were: 28.35 and 46.76 (for NRF), 1.0 and 3.0 (DASH-nutrient), 0.5 and 3.0 (OMNIHEART-carbohydrate), 1.0 and 3.0 (OMNIHEART-MFA), 0.5 and 2.5 (OMNIHEART-protein), respectively.

b R<sup>2</sup><sub>γ</sub>: goodness of fit (training data); Q<sup>2</sup><sub>γ</sub>: goodness of prediction (test set data); AUROC: area-under-receiver-operator-curve; TPR: true positive rate, defined as the number of participants correctly predicted as having a healthy dietary pattern based on their urinary metabolites divided by the total number of participants with a dietary score in the top quarter; TNR: true negative rate, defined as the number of participants correctly predicted as having an unhealthy dietary pattern based on their urinary metabolites divided by the total number of participants with a dietary score in the bottom quarter; accuracy is calculated as number of participants correctly predicted as having healthy or unhealthy dietary patterns divided by the total number of participants.

**Supplementary Table 6. Descriptive statistics of the U.S. INTERMAP population, the participants included in the data set and the dietary outliers, estimated using two techniques, are shown.**

The mean (median) and standard deviation, or number and percentage, are shown for different descriptors. Last column shows the *P*-value of a two-sample t-test or  $\chi^2$ -test, as appropriate, of the comparison between the participants included in the data set and the dietary outliers.

| Descriptor                                                       | Included in the data set          | Dietary outliers          | <i>P</i> -value                 |
|------------------------------------------------------------------|-----------------------------------|---------------------------|---------------------------------|
|                                                                  | (n = 1,848)                       | (n = 184)                 |                                 |
|                                                                  | Mean (median) $\pm$ s.d. or n (%) |                           |                                 |
| Age (years)                                                      | 49.1 (49) $\pm$ 5.4               | 49.6 (50) $\pm$ 5.4       | 2.31 $\times$ 10 <sup>-1</sup>  |
| Sex (% men)                                                      | 954 (51.6%)                       | 86 (46.7%)                | 2.06 $\times$ 10 <sup>-1</sup>  |
| Center – Baltimore                                               | 225 (89.6%)                       | 26 (10.4%)                | 4.42 $\times$ 10 <sup>-1</sup>  |
| Center – Chicago                                                 | 278 (91.1%)                       | 27 (8.9%)                 | 8.94 $\times$ 10 <sup>-1</sup>  |
| Center – Corpus Christi, Hispanic                                | 208 (89.3%)                       | 25 (10.7%)                | 3.44 $\times$ 10 <sup>-1</sup>  |
| Center – Corpus Christi, Non-Hispanic                            | 225 (91.8%)                       | 20 (8.2%)                 | 6.04 $\times$ 10 <sup>-1</sup>  |
| Center – Honolulu                                                | 245 (96.8%)                       | 8 (3.2%)                  | 4.81 $\times$ 10 <sup>-4</sup>  |
| Center – Jackson                                                 | 217 (86.1%)                       | 35 (13.9%)                | 4.28 $\times$ 10 <sup>-3</sup>  |
| Center – Minneapolis                                             | 226 (91.5%)                       | 21 (8.5%)                 | 7.47 $\times$ 10 <sup>-1</sup>  |
| Center – Pittsburgh                                              | 224 (91.1%)                       | 22 (8.9%)                 | 9.48 $\times$ 10 <sup>-1</sup>  |
| Systolic blood pressure (BP) (mm Hg)                             | 117.8 (116.8) $\pm$ 13.47         | 121.6 (119.4) $\pm$ 15.31 | 1.47 $\times$ 10 <sup>-3</sup>  |
| Diastolic BP (mm Hg)                                             | 73.3 (72.8) $\pm$ 9.65            | 73.9 (72.9) $\pm$ 9.82    | 3.90 $\times$ 10 <sup>-1</sup>  |
| Body Mass Index (kg $\times$ m <sup>-2</sup> )                   | 28.6 (27.8) $\pm$ 5.60            | 31.7 (30.4) $\pm$ 7.15    | 4.99 $\times$ 10 <sup>-8</sup>  |
| Diagnosed Diabetes Mellitus (%)                                  | 133 (7.2%)                        | 19 (10.3%)                | 1.24 $\times$ 10 <sup>-1</sup>  |
| Diagnosed heart condition/disease (%)                            | 158 (8.5%)                        | 19 (10.3%)                | 4.15 $\times$ 10 <sup>-1</sup>  |
| Smoker (%)                                                       | 280 (15.2%)                       | 36 (19.6%)                | 1.15 $\times$ 10 <sup>-1</sup>  |
| Physical activity (hrs/day)                                      | 3.2 (2.0) $\pm$ 3.1               | 3.7 (2.8) $\pm$ 3.4       | 5.69 $\times$ 10 <sup>-2</sup>  |
| On drug for high BP, CVD or lipids (%)                           | 483 (26.1%)                       | 70 (38.0%)                | 5.38 $\times$ 10 <sup>-4</sup>  |
| Reported energy intake (kcal/day), visit 1                       | 2311 (2209) $\pm$ 740             | 1626 (1405) $\pm$ 770     | 2.42 $\times$ 10 <sup>-24</sup> |
| Reported energy intake (kcal/day), visit 2                       | 2307 (2197) $\pm$ 748             | 1564 (1368) $\pm$ 677     | 8.15 $\times$ 10 <sup>-33</sup> |
| Estimated energy requirement (kcal/day)                          | 2198 (2182) $\pm$ 357             | 2289 (2251) $\pm$ 409     | 4.18 $\times$ 10 <sup>-3</sup>  |
| Reported protein intake (kcal/day), visit 1                      | 350 (326) $\pm$ 125               | 256 (236) $\pm$ 116       | 4.45 $\times$ 10 <sup>-21</sup> |
| Estimated protein intake from urea excretion (kcal/day), visit 1 | 275 (264) $\pm$ 80                | 269 (264) $\pm$ 81        | 4.08 $\times$ 10 <sup>-1</sup>  |
| Reported protein intake (kcal/day), visit 2                      | 352 (331) $\pm$ 127               | 251 (223) $\pm$ 128       | 2.02 $\times$ 10 <sup>-20</sup> |
| Estimated protein intake from urea excretion (kcal/day), visit 2 | 273 (264) $\pm$ 81                | 268 (262) $\pm$ 91        | 4.67 $\times$ 10 <sup>-1</sup>  |
| Nutrient-Rich Food (NRF) index                                   | 39.0 (36.3) $\pm$ 15.3            | 37.6 (33.7) $\pm$ 15.4    | 2.34 $\times$ 10 <sup>-1</sup>  |

**Supplementary Table 7. Nutrients for 1,848 U.S. INTERMAP participants included in this study.**  
**Nutrients are expressed as % of kcal, unless otherwise specified.**

| Nutrients                           | Visit 1 |      |        | Visit 2 |      |        |
|-------------------------------------|---------|------|--------|---------|------|--------|
|                                     | Mean    | SD   | Median | Mean    | SD   | Median |
| MFA 14:1-myristoleic acid           | 0.03    | 0.04 | 0.01   | 0.03    | 0.04 | 0.01   |
| MFA 16:1-palmitoleic acid           | 0.60    | 0.31 | 0.57   | 0.60    | 0.28 | 0.58   |
| MFA 18:1-oleic acid                 | 11.57   | 3.21 | 11.46  | 11.66   | 3.10 | 11.70  |
| MFA 20:1-gadoleic acid              | 0.08    | 0.06 | 0.06   | 0.07    | 0.06 | 0.06   |
| MFA 22:1-erucic acid                | 0.02    | 0.05 | 0.01   | 0.02    | 0.06 | 0.01   |
| PFA 18:2-linoleic acid              | 6.28    | 2.45 | 5.94   | 6.26    | 2.37 | 5.99   |
| PFA 18:3-linolenic acid             | 0.68    | 0.33 | 0.62   | 0.68    | 0.31 | 0.62   |
| PFA 18:4-stearidonic acid           | 0.00    | 0.01 | 0.00   | 0.00    | 0.01 | 0.00   |
| PFA 20:4-arachidonic acid           | 0.06    | 0.05 | 0.05   | 0.06    | 0.04 | 0.05   |
| PFA 20:5-eicosapentaenoic acid      | 0.02    | 0.05 | 0.00   | 0.02    | 0.05 | 0.00   |
| PFA 22:5-docosapentaenoic acid      | 0.01    | 0.02 | 0.00   | 0.01    | 0.02 | 0.00   |
| PFA 22:6-docosahexaenoic acid       | 0.04    | 0.09 | 0.02   | 0.04    | 0.09 | 0.02   |
| omega-6 PFA                         | 6.34    | 2.45 | 6.00   | 6.32    | 2.38 | 6.04   |
| long chain omega-3 PFA              | 0.07    | 0.15 | 0.02   | 0.07    | 0.15 | 0.03   |
| SFA 4:0-butyric acid                | 0.18    | 0.14 | 0.15   | 0.18    | 0.15 | 0.15   |
| SFA 6:0-caproic acid                | 0.09    | 0.07 | 0.07   | 0.09    | 0.08 | 0.07   |
| SFA 8:0-caprylic acid               | 0.09    | 0.07 | 0.07   | 0.08    | 0.09 | 0.07   |
| SFA 10:0-capric acid                | 0.17    | 0.11 | 0.15   | 0.16    | 0.11 | 0.14   |
| SFA 12:0-lauric acid                | 0.38    | 0.44 | 0.23   | 0.36    | 0.39 | 0.23   |
| SFA 14:0-myristic acid              | 0.88    | 0.47 | 0.82   | 0.88    | 0.47 | 0.80   |
| SFA 16:0-palmitic acid              | 5.89    | 1.62 | 5.90   | 5.94    | 1.63 | 5.94   |
| SFA 18:0-stearic acid               | 2.91    | 0.95 | 2.88   | 2.97    | 0.92 | 2.94   |
| SFA 20:0-arachidic acid             | 0.01    | 0.03 | 0.00   | 0.01    | 0.02 | 0.00   |
| SFA 22:0-behenic acid               | 0.02    | 0.04 | 0.00   | 0.01    | 0.04 | 0.00   |
| TFA 18:1-trans-octadecenoic acid    | 1.62    | 0.86 | 1.48   | 1.70    | 0.88 | 1.54   |
| TFA 18:2-trans-octadecadienoic acid | 0.25    | 0.13 | 0.23   | 0.25    | 0.12 | 0.24   |
| alcohol                             | 1.83    | 4.10 | 0.04   | 1.67    | 3.90 | 0.05   |
| fibre (g/1000kcal)                  | 9.01    | 3.62 | 8.36   | 8.91    | 3.90 | 8.17   |
| fructose                            | 5.09    | 3.19 | 4.48   | 5.01    | 3.12 | 4.41   |
| galactose                           | 0.04    | 0.09 | 0.01   | 0.04    | 0.10 | 0.01   |
| glucose                             | 5.40    | 2.93 | 4.94   | 5.36    | 2.86 | 4.89   |
| lactose                             | 2.28    | 2.02 | 1.65   | 2.31    | 1.99 | 1.75   |
| maltose                             | 0.62    | 0.53 | 0.46   | 0.63    | 0.60 | 0.46   |
| sucrose                             | 10.67   | 5.55 | 9.81   | 10.87   | 5.49 | 10.06  |
| starch                              | 23.03   | 6.39 | 22.65  | 22.86   | 6.38 | 22.53  |
| alanine                             | 0.73    | 0.21 | 0.70   | 0.74    | 0.21 | 0.71   |

| Nutrients                      | Visit 1 |         |         | Visit 2 |         |         |
|--------------------------------|---------|---------|---------|---------|---------|---------|
|                                | Mean    | SD      | Median  | Mean    | SD      | Median  |
| arginine                       | 0.85    | 0.23    | 0.82    | 0.86    | 0.23    | 0.83    |
| aspartic acid                  | 1.31    | 0.34    | 1.27    | 1.32    | 0.35    | 1.28    |
| cysteine                       | 0.21    | 0.05    | 0.20    | 0.21    | 0.05    | 0.20    |
| glutamic acid                  | 3.01    | 0.63    | 2.96    | 3.02    | 0.64    | 2.96    |
| glycine                        | 0.65    | 0.19    | 0.63    | 0.66    | 0.20    | 0.63    |
| histidine                      | 0.43    | 0.11    | 0.42    | 0.43    | 0.12    | 0.42    |
| isoleucine                     | 0.70    | 0.18    | 0.68    | 0.71    | 0.18    | 0.68    |
| leucine                        | 1.19    | 0.29    | 1.16    | 1.20    | 0.29    | 1.16    |
| lysine                         | 1.03    | 0.31    | 0.98    | 1.04    | 0.31    | 1.00    |
| methionine                     | 0.35    | 0.10    | 0.34    | 0.35    | 0.10    | 0.34    |
| phenylalanine                  | 0.67    | 0.15    | 0.66    | 0.67    | 0.15    | 0.66    |
| proline                        | 0.99    | 0.22    | 0.97    | 0.99    | 0.22    | 0.97    |
| serine                         | 0.69    | 0.15    | 0.67    | 0.69    | 0.16    | 0.68    |
| threonine                      | 0.59    | 0.15    | 0.57    | 0.60    | 0.16    | 0.58    |
| tryptophan                     | 0.18    | 0.04    | 0.18    | 0.18    | 0.04    | 0.18    |
| tyrosine                       | 0.54    | 0.13    | 0.52    | 0.54    | 0.13    | 0.52    |
| valine                         | 0.78    | 0.19    | 0.76    | 0.79    | 0.19    | 0.76    |
| cholesterol (mg/1000kcal)      | 128.94  | 67.67   | 113.07  | 131.16  | 69.38   | 115.97  |
| beta-carotene (µg/1000kcal)    | 1867.14 | 2121.48 | 1131.10 | 2043.54 | 2781.23 | 1100.88 |
| vitamin A (IU/1000kcal)        | 3846.23 | 3717.09 | 2645.95 | 4130.13 | 4801.33 | 2554.17 |
| retinol (µg/1000kcal)          | 218.68  | 335.75  | 141.03  | 215.46  | 291.52  | 145.92  |
| vitamin A (RE/1000kcal)        | 529.87  | 488.07  | 393.46  | 556.05  | 562.11  | 403.20  |
| thiamin (mg/1000kcal)          | 0.87    | 0.24    | 0.83    | 0.86    | 0.23    | 0.83    |
| riboflavin (mg/1000kcal)       | 0.92    | 0.29    | 0.86    | 0.91    | 0.29    | 0.86    |
| niacin (mg/1000kcal)           | 11.52   | 3.28    | 11.06   | 11.51   | 3.35    | 10.99   |
| pantothenic acid (mg/1000kcal) | 2.27    | 0.85    | 2.14    | 2.26    | 0.85    | 2.12    |
| vitamin B6 (mg/1000kcal)       | 0.90    | 0.33    | 0.85    | 0.91    | 0.33    | 0.86    |
| folate (µg/1000kcal)           | 136.08  | 63.79   | 123.14  | 135.78  | 67.76   | 120.50  |
| vitamin B12 (mg/1000kcal)      | 2.23    | 2.95    | 1.67    | 2.30    | 2.58    | 1.72    |
| vitamin C (mg/1000kcal)        | 53.52   | 41.84   | 44.11   | 52.71   | 41.60   | 42.65   |
| vitamin E (mg/1000kcal)        | 4.50    | 2.03    | 4.18    | 4.46    | 2.05    | 4.10    |
| calcium (mg/1000kcal)          | 366.23  | 159.22  | 333.00  | 364.94  | 155.82  | 333.87  |
| calcium (mmol/24-hr)           | 4.25    | 2.30    | 3.84    | 4.25    | 2.28    | 3.91    |
| copper (mg/1000kcal)           | 0.67    | 0.24    | 0.63    | 0.66    | 0.25    | 0.62    |
| iron (heme) (mg/1000kcal)      | 0.48    | 0.37    | 0.41    | 0.49    | 0.35    | 0.43    |
| iron (non-heme) (mg/1000kcal)  | 7.32    | 3.03    | 6.61    | 7.34    | 3.19    | 6.49    |
| magnesium (mg/1000kcal)        | 148.04  | 43.44   | 140.56  | 146.89  | 44.99   | 139.68  |
| magnesium (mmol/24-hr)         | 4.29    | 1.68    | 4.07    | 4.31    | 1.75    | 4.08    |

| Nutrients                | Visit 1 |        |         | Visit 2 |        |         |
|--------------------------|---------|--------|---------|---------|--------|---------|
|                          | Mean    | SD     | Median  | Mean    | SD     | Median  |
| phosphorus (mg/1000kcal) | 589.87  | 139.30 | 574.87  | 590.75  | 137.20 | 573.17  |
| potassium (mg/1000kcal)  | 1354.60 | 395.36 | 1298.59 | 1347.83 | 410.77 | 1297.71 |
| potassium (mmol/24-hr)   | 59.49   | 23.02  | 56.04   | 57.83   | 22.90  | 54.60   |
| selenium (µg/1000kcal)   | 60.25   | 47.32  | 56.62   | 59.65   | 18.13  | 57.02   |
| sodium (mg/1000kcal)     | 1661.83 | 470.36 | 1606.60 | 1667.46 | 461.20 | 1609.17 |
| sodium (mmol/24-hr)      | 164.46  | 66.45  | 155.37  | 165.46  | 70.68  | 153.72  |

## SUPPLEMENTARY NOTES

### Supplementary Note 1. Reproducibility of some nutrients may be lower than urinary metabolites.

We found that urinary potassium, a well-known dietary biomarker of fruit and vegetable intakes and diet quality<sup>2</sup>, was relatively stable over the 3-week period (pICC=0.59,  $P=1.99\times 10^{-171}$ ), with dietary potassium showing a lower value (pICC=0.51,  $P=1.28\times 10^{-120}$ ) than its urinary counterpart. Yet two urinary metabolites associated with potassium, NMNA (pICC=0.71,  $P=1.80\times 10^{-280}$ ) and 3-hydroxymandelate (pICC=0.60,  $P=7.77\times 10^{-179}$ ), had higher pICCs than urinary potassium over the same period, while other associated metabolites such as proline betaine (pICC=0.54,  $P=2.71\times 10^{-143}$ ) and hippurate (pICC=0.54,  $P=1.44\times 10^{-142}$ ) had intermediate values, but still higher than for dietary potassium (pICC 95% confidence interval 0.47–0.54).

### Supplementary Note 2. Discordance between biochemical pathway information and statistical relationships in the data.

Levels of metabolites participating in multiple biochemical reactions are influenced by a variety of enzymatic conversions creating extra degrees of freedom and therefore more variance in their measurements. This variance can obscure correlations between structurally similar metabolites and those in closely related pathways, whereas metabolites in simple linear chain conversions are more likely to be directly or inversely correlated. For example, the intermediate metabolites niacin and nicotinamide (**Figure 4A**) are involved in many different biochemical reactions and pathways (**Extended Data Figure 2**), which may explain the absence of correlations between NMNA and *N*-methylpyridinium with *N*-methylnicotinamide and 2PY. Moreover, the reaction involving niacin and nicotinamide is known to occur due to host genome enzymes (shown in purple boxes in **Figure 4**) as well as due to microbial genomes (shown in green) which adds further complexity.

*N*-methylnicotinate (NMNA, also known as trigonelline) and *N*-methylpyridinium have previously been linked to coffee consumption<sup>3</sup>, whereas NMNA has also been reported to be a biomarker of peas consumption<sup>4</sup> and other foods that are rich in vitamin B3 (niacin). Another recent report linked 2-furoylglycine to coffee consumption<sup>5</sup>. We found that the urinary excretions of NMNA and *N*-methylpyridinium were correlated (cluster M8, **Figure 2**), whereas 2-furoylglycine separately clusters with phenylacetylglutamine (PAG) and glutamine (cluster M2). This is biologically plausible as *N*-methylpyridinium is a product of thermal degradation (Maillard reaction) of NMNA<sup>3</sup>, whereas 2-furoylglycine is excreted in urine via a different mechanism<sup>5</sup> and these metabolites are not in close biological proximity in the human

metabolic reaction network (see **Extended Data Figure 2** for the full connected network and **Supplementary Table 4** for abbreviations and full names).

## SUPPLEMENTARY DISCUSSION

### **Functional relationships between nutrients and health outcomes.**

Certain urinary metabolites that we found associated with nutrients are have also been found in relation to health outcomes. For example, sodium is well-known to relate to blood pressure differences<sup>6</sup> and higher urinary calcium excretion associated with raised blood pressure<sup>7</sup>. Here we observed associations between urinary sodium and calcium with citrate and formate. Other studies have reported differences in these urinary metabolites in relation to renal function<sup>8,9</sup> (citrate and formate) and blood pressure<sup>10</sup> (formate). The association between urinary sodium and formate may be explained by sodium-cation transporters that work in parallel with solute carrier family 26 member 6 (slc26a6) renal tubular transporter proteins, which mediate the uptake of monovalent anions including formate through exchange processes with oxalate and chloride<sup>11</sup>. This points to a possible mechanism in renal tubules involving sodium and formate in blood pressure regulation. Citrate inhibits urinary crystallization of calcium salts by forming soluble (divalent) calcium-complexes and thereby reduces the potential for kidney stone formation including calcium-oxalate<sup>12</sup>. Citrate is filtered and reabsorbed by proximal tubular transporters that are dependent on sodium<sup>13</sup>, although we did not find total citrate associated with (monovalent) sodium here. Increased circulating sodium results in higher concentrations of sodium and calcium in the urine. Urinary citrate-calcium complexation may help to reduce renal stone formation as it prevents precipitation of calcium salts in the kidney<sup>14</sup>.

Another example relates to proline betaine which has been reported to have an inverse relationship with blood pressure and obesity<sup>8,15</sup>. Proline betaine is present in high concentrations in citrus fruits (particularly oranges), correlates with dietary vitamin C<sup>15</sup> and has been used as a biomarker for the assessment of dietary citrus fruit intake<sup>16</sup>. 2-hydroxy-2-(4-methylcyclohex-3-en-1-yl)propoxy glucuronide is another marker of citrus fruit intake that has previously only been tentatively identified<sup>17</sup>; here we confirm the structural elucidation from NMR and mass spectrometric data.

Host-gut microbial co-metabolites hippurate, 4-hydroxyhippurate and 3-hydroxymandelate correlated with each other possibly due to polyphenolic metabolism in the proximal colon (followed by subsequent glycine conjugation in mitochondria to form hippurate/4-hydroxyhippurate), whereas the gut microbial co-metabolite PAG has its origins in the distal colon (protein putrefaction); PAG correlated with glutamine (direct link in the network because glutamination is dependent on mitochondrial CoA activation) and 2-



furoylglycine but not with the above three gut microbial co-metabolites. The correlation of PAG with 2-furoylglycine cannot be explained from the metabolic reaction network map (**Extended Data Figure 2**). 2-furoate may compete with other compounds to be glycine conjugated in the mitochondria explaining this apparent ‘wormhole connection’<sup>18</sup> between correlated metabolites that may reflect the common site (mitochondria) of co-enzyme A (CoA) mediated metabolic activation prior to amino acid conjugation<sup>19</sup>.

### **Urinary metabolites can differentiate between healthy and unhealthy dietary patterns.**

We also show that a model built using samples from the first urine collection accurately predict dietary patterns based on the urinary metabolites in the second urine collection, for the same individuals three weeks later. This further attests to the utility of urinary metabolic profiles for the reliable capture of dietary information. Nineteen of the 28 metabolites associated with different dietary patterns in our previous study<sup>20</sup> were also seen in our set of 46 nutrient-associated urinary metabolites. Of these, five (carnitine, *O*-acetylcarnitine, PAG, alanine and fatty acids – suggestive of a diet high in meat/animal protein intake) were associated with the diet least concordant with WHO healthy eating guidelines, while 14 (hippurate, 4-hydroxyhippurate, dimethylamine, trimethylamine-*N*-oxide, *N*-acetyl-*S*-methyl-cysteine sulfoxide, *S*-methyl-cysteine sulfoxide and its two (unidentified) metabolites, acetate, creatine, 2PY, NMNA and *N*-methylnicotinamide) were associated with the diet most concordant with WHO guidelines, reflecting higher intakes of fruits, vegetables and fish<sup>20</sup>.

### **More details on strengths and limitations of the current study.**

The INTERMAP study in U.S. and U.K. is cross-sectional with a short-term (3-week) follow-up for replication. The intake of nutrients was calculated from foods based on four multi-pass 24-hr dietary recall interviews using national food composition tables to convert foods to nutrients. While repeated dietary recall interviews provide more detailed and accurate information when compared to, for example, food-frequency questionnaires, they still rely on participant recall and are thus prone to reporting and other biases. We used two independent methods to eliminate obvious outliers, one based on spectroscopic data and the other based on concurrence between reported and estimated dietary intakes. Compared with those included, the excluded participants had significantly higher BMI but lower calculated energy intake from their 24-hr recalls, reflecting bias in their dietary data (see **Supplementary Discussion** below; **Supplementary Table 6**). BMI is an often used, but crude, measure of adiposity that highly correlates with the body fat percentage<sup>21</sup>. Other measures of adiposity, such as waist circumference or fat free mass, were unavailable in INTERMAP. In the 3-week follow-up no significant weight gain/loss was recorded in the participants. The associations

reported here were not materially altered when BMI and physical activity were included as additional covariates in the models (**Supplementary Figure 7**).

While 24-hr urine samples have the advantage over other methods (e.g. spot or overnight samples) in that they capture metabolic process information over an entire day, their collection is less practicable than other methods. Nonetheless, there are promising data to suggest that less burdensome methods such as cumulative samples overnight<sup>20</sup>, collection of repeated spot urine samples<sup>22</sup> or timed spot urine samples<sup>23</sup> may provide a valid alternative means to approximate the 24-hr urinary metabolome and hence be reflective of nutrient intakes. Therefore, the results presented here may extend to different types of samples such as single 24-hr or multiple spot urine samples, although this will need to be tested in other studies.

<sup>1</sup>H-NMR spectroscopy has been shown to be effective and reliable in the exploration of nutritional interventions and discovery of novel metabolic biomarkers associated with diet<sup>20,24,25</sup>. Although <sup>1</sup>H-NMR spectroscopy is less sensitive than mass spectrometry, it is exceptionally reproducible for measuring complex mixtures of metabolites in biofluids<sup>26-28</sup> and detects abundant metabolites with high dynamic ranges that relate to a variety of metabolic pathways<sup>29</sup>. Our approach is readily scalable to procedurally intense studies such as large-scale epidemiologic research, as it takes just 5 minutes to obtain a <sup>1</sup>H-NMR spectrum from a urine sample.

We provide three means by which the nutrient-metabolite associations can be explored. First, the heat map in **Figure 2** summarizes associations between each nutrient-metabolite pair visually. Second, **Supplementary Table 1** shows all significant associations with metabolites for each nutrient and **Supplementary Table 2** does the same by listing for each metabolite all significant associations with nutrients. Last, a standalone data visualization software program (NutriomeXplorer) allows deep exploration of the associations between nutrients and urinary metabolites and is supplied as a readily accessible resource for further direct interrogation of our data beyond the associations reported here (**Supplementary Figures 8–15**).

While we have reproduced our findings and assessed the stability of the metabolites, these data can not be used to define a dietary score (akin to DASH/NRF/OMNIHEART scores) based on urine measurements alone due to the cross-sectional (with short-term follow-up) design of the study. Any such endeavour should be validated in a controlled clinical trial to avoid introduction of bias/misreporting into a dietary score that can be applied solely based on measurements in urine. The nutrients and other chemical compounds found in foods have different kinetics of uptake and excretion of metabolic products in the urine. Some compounds such as proline betaine (relating to citrus fruits) and tartrate (relating to grapes) have been shown using kinetic studies to be cleared from the body within 2-8 hours after intake<sup>15,30</sup>, while

for others, such as sodium, excretion may occur over two to three or more days<sup>31</sup>, and for yet other variables the information from reaction kinetics is lacking. We included 24hr recall data for the day of, and the day before, the urine collection and therefore may have underestimated excretion of nutrient-related metabolites occurring over a longer timescale. Therefore, our approach based on urinary spectroscopic data reported here should ideally be used alongside conventional dietary measurements to reflect both short- and long-term exposures.

### **Dietary outliers underreport energy and protein intakes, and have higher BMI.**

The U.S. INTERMAP population consists of 2,195 participants from 8 population samples. A total of 2,164 participants had complete dietary data and as well as <sup>1</sup>H-NMR data of two 24-hr urine samples. A total of 132 participants were excluded due to the <sup>1</sup>H-NMR data mapping outside the 95% Hotelling's T<sup>2</sup> ellipse<sup>10</sup>. In order to account for possible under- or over-reporting, and be left with a homogenous dataset for analysis, for the 2,032 participants that remain the ratios between the reported and estimated protein intake and the reported and estimated energy intakes (see **Methods**) were mapped as a multivariate distribution and the participants (n=184) that mapped outside the 95% confidence interval were excluded from data analysis (**Extended Data Figure 3**) (hereafter referred to as the 'dietary outliers'). This leaves a total of 1,848 U.S. individuals for the data analysis (hereafter referred to as the 'dataset').

The estimated energy requirement is slightly higher for the dietary outliers than it is for the 1,848 participants included in the analysis ( $P=4.18\times 10^{-3}$ ), however the reported energy intakes for the dietary outliers are significantly lower ( $P=2.42\times 10^{-24}$  for visit 1 and  $P=8.15\times 10^{-33}$  for visit 2) compared to the reported energy intakes from the participants in the dataset (**Supplementary Table 5**). The estimated protein intake from the dietary outliers and the dataset is not significantly different, however the reported protein intakes (see **Methods**) are significantly lower ( $P=4.45\times 10^{-21}$  for visit 1 and  $P=2.02\times 10^{-20}$  for visit 2) in the dietary outliers. The significant underreporting taken together with the fact that the BMI for the dietary outliers is significantly higher ( $P=4.99\times 10^{-8}$ ) compared to the data set is in accordance with estimated higher degrees of under-reporting in obese populations<sup>32-34</sup>. Other differences between dietary outliers and the 1,848 participants included in the analysis include higher systolic blood pressure ( $P=1.47\times 10^{-3}$ ) and medication use ( $P=5.38\times 10^{-4}$ ) in the dietary outlier group. The proportion of individuals from the Jackson center is significantly higher in the dietary outlier group, this population has previously been found to have higher blood pressure<sup>35</sup>, whereas the Honolulu center has significantly less individuals in the dietary outlier group ( $P=4.81\times 10^{-4}$ ). Nutrient intakes for both visits for the 1,848 participants are given in **Supplementary Table 6**.

## SUPPLEMENTARY METHODS

**Adjusted Coefficient of Commonality.** Proofs of the Adjusted Coefficient of Commonality (ACC) properties. For a metric distance ( $d$ ) to be proper it has to specify the following properties:

- 1) Non-negativity:  $d \geq 0$
- 2a) Identity:  $d(A, A) = 0$
- 2b) Definitiveness:  $d(A, B) = 0$  iff  $A \equiv B$
- 3) Symmetry:  $d(A, B) \equiv d(B, A)$
- 4) Triangle inequality:  $d(A, B) \leq d(A, C) + d(B, C) \quad \forall A, B, C$

Prior to proving properties 1-4 above, I write here the notations and operations that will be used in the proofs.

### Notations

$A$  = charged binary set (hereafter referred to as 'cset') with values (-1, 0, 1) for each element  
An element of a cset with value 0 means it is not in the set, and 1/-1 indicate a charged (signed) contribution

$a_i$  = element  $i$  in cset  $A$

$\emptyset$  = empty set, a cset of which all elements are 0

$A^-$  = additive inverse of cset  $A$

$A + A^- = \emptyset$

### Set measures

$|A|$  = cardinality of cset  $A$ , number of elements in  $A$  that are non-zero

$|A| \equiv |A^-|$

$|\emptyset| = 0$

$|A|$  = total number of elements of cset  $A$

$|A_i| \geq |A|$

$|A_i| \equiv |B_i| \quad \forall A, B$

### Operations

$|A \cap B|$  = cardinality of the intersection of csets A and B, defined as the number of elements in A and B that are identical and also non-zero (i.e.  $a_i = 1$  and  $b_i = 1$  or  $a_i = -1$  and  $b_i = -1$ )

$|A \cap B| \equiv |B \cap A|$  intersection operator is commutative

$|A \cap B^-| \equiv |A^- \cap B|$

$|A \cap \emptyset| = 0$

$|\emptyset \cap \emptyset| = 0$

$|A \cup B|$  = cardinality of the union of csets A and B, defined as the number of elements in A and B that are non-zero in A, in B or both A and B

$|A \cup B| \equiv |A| + |B| - |A \cap B| - |A \cap B^-|$

$|A \cup B| \equiv |B \cup A|$  union operator is commutative

$|A \cup B| \equiv |A \cup B^-| \equiv |A^- \cup B|$

$|A \cup \emptyset| = |A|$

$|\emptyset \cup \emptyset| = 0$

$|A \cap B| + |A \cap B^-| \leq |A \cup B|$

### Similarity measure and distance

The adjusted coefficient of commonality (ACC):

$$ACC = \frac{|A \cap B| - |A \cap B^-|}{|A \cup B|}$$

ACC distance (d):

$$d(A, B) = 1 - ACC = 1 - \frac{|A \cap B| - |A \cap B^-|}{|A \cup B|}$$

### **Proof of property 1**

$$d(A, B) = 1 - \frac{|A \cap B| - |A \cap B^-|}{|A \cup B|} \geq 0 \rightarrow 1 \geq \frac{|A \cap B| - |A \cap B^-|}{|A \cup B|}$$

By definition all terms in the equation are non-negative, therefore, in order to prove the maximum value the ACC can be is indeed 1 we remove  $A \cap B^-$  from the equation as it contributes negatively.

$$1 \geq \frac{|A \cap B|}{|A \cup B|}$$

The maximal value the nominator can obtain is if both sets are equal, thus when  $A \cap B = A \cup B$ , proving property 1.

### **Proof of property 2a**

$$d(A, A) = 1 - \frac{|A \cap A| - |A \cap A^-|}{|A \cup A|} = 0 \rightarrow 1 - \frac{|A| - 0}{|A|} = 1 - \frac{|A|}{|A|} = 0$$

### Proof of property 2b

$$d(A, B) = 1 - \frac{|A \cap B| - |A \cap B^-|}{|A \cup B|} = 0 \rightarrow \frac{|A \cap B| - |A \cap B^-|}{|A \cup B|} = 1 \rightarrow |A \cap B| - |A \cap B^-| = |A \cup B|$$

$$\begin{aligned} |A \cap B| - |A \cap B^-| &= |A| + |B| - |A \cap B| - |A \cap B^-| \rightarrow |A \cap B| + |A \cap B^-| = |A| + |B| \\ 2|A \cap B| &= |A| + |B| \end{aligned}$$

Given the fact:

$$\begin{aligned} |A \cap B| &\leq \min(|A|, |B|) \\ 2 \times \min(|A|, |B|) &= |A| + |B| \end{aligned}$$

Suppose the minimum cardinality is  $|A|$ :

$$2|A| = |A| + |B| \rightarrow |A| = |B|$$

Therefore the distance between A and B is only 0 if both sets are identical.

### Proof of property 3

$$d(A, B) = d(B, A) \rightarrow 1 - \frac{|A \cap B| - |A \cap B^-|}{|A \cup B|} = 1 - \frac{|B \cap A| - |B \cap A^-|}{|B \cup A|}$$

By definition  $|A \cap B| \equiv |B \cap A|$  and  $|A \cup B| \equiv |B \cup A|$ , therefore the above is equivalent.

### Proof of property 4

#### Case 1, A = ∅

By definition, the distance of a cset and an empty cset is 1. Assuming A is empty we get:

$$\begin{aligned} d(A, B) &\leq d(A, C) + d(B, C) \\ 1 &\leq 1 + d(B, C) \rightarrow 0 \leq d(B, C) \end{aligned}$$

This is property 1 and has already been proven. Naturally the same is true if B were empty.

#### Case 2, C = ∅

For assuming C is empty we get:

$$d(A, B) \leq 1 + 1 \rightarrow 1 - \frac{|A \cap B| - |A \cap B^-|}{|A \cup B|} \leq 2 \rightarrow \frac{|A \cap B| - |A \cap B^-|}{|A \cup B|} \geq -1$$

This reduced our problem to proving the lower bound of the ACC is indeed -1. So in order to minimize the left hand side, we assume  $|A \cap B| = 0$ , as it contributes positively to the ACC:

$$-\frac{|A \cap B^-|}{|A \cup B|} \geq -1 \rightarrow |A \cup B| \geq |A \cap B^-|$$

Which by definition is true as no intersection of two csets can be larger than the union of the two ( $|A \cap B| + |A \cap B^-| \leq |A \cup B|$ ).

### Case 3, A ≡ B

Same goes for when csets are equal, first we assume A≡B, making use of property 2:

$$d(A, B) \leq d(A, C) + d(B, C)$$

$$d(A, A) \leq d(A, C) + d(A, C)$$

$$0 \leq d(A, C) + d(A, C) \rightarrow 0 \leq 2 \times d(A, C) \rightarrow \frac{0}{2} \leq \frac{2 \times d(A, C)}{2} \rightarrow 0 \leq d(A, C)$$

This is property 1 and has already been proven.

### Case 4, A ≡ C

Next is when A≡C:

$$d(A, B) \leq d(A, C) + d(B, C)$$

$$d(A, B) \leq d(A, A) + d(B, A)$$

$$d(A, B) \leq 0 + d(B, A) \rightarrow d(A, B) = d(B, A)$$

This is property 3 and has already been proven.

### Case 5, A ≠ B ≠ C, and A ≠ ∅, B ≠ ∅ and C ≠ ∅

Next, we assume that all csets are non-empty and that they are all different.

$$d(A, B) \leq d(A, C) + d(B, C) \quad \forall A, B, C$$

$$1 - \left( \frac{|A \cap B| - |A \cap B^-|}{|A \cup B|} \right) \leq \left( 1 - \left( \frac{|A \cap C| - |A \cap C^-|}{|A \cup C|} \right) + 1 - \left( \frac{|B \cap C| - |B \cap C^-|}{|B \cup C|} \right) \right)$$
$$\frac{|A \cap C| - |A \cap C^-|}{|A \cup C|} + \frac{|B \cap C| - |B \cap C^-|}{|B \cup C|} \leq \frac{|A \cap B| - |A \cap B^-|}{|A \cup B|} + 1$$

In **Supplementary Figure 16** the overlap between csets A, B and C is broken up in 13 parts (a–m); the lower case letters also denote the number of elements in each part as follows:

$$a = |A \cap B \cap C| \equiv |A^- \cap B^- \cap C^-|$$

$$b = |A \cap B \cap C^-| \equiv |A^- \cap B^- \cap C|$$

$$c = |A \cap B^- \cap C| \equiv |A^- \cap B \cap C^-|$$

$$d = |A^- \cap B \cap C| \equiv |A \cap B^- \cap C^-|$$

$$e = |A \cap B^-| - c - d$$

$$f = |A \cap C^-| - b - d$$

$$g = |B \cap C^-| - b - c$$

$$h = |A \cap B| - a - b$$

$$i = |A \cap C| - a - c$$

$$j = |B \cap C| - a - d$$

$$k = |A| - a - b - c - d - e - f - h - i$$

$$l = |B| - a - b - c - d - e - g - h - j$$

$$m = |C| - a - b - c - d - f - g - i - j$$

Furthermore, we define n as the union of the 3 csets:

$$n = a + b + c + d + e + f + g + h + i + j + k + l + m$$

We can now rewrite the inequality using equations for a-n as follows:

$$\frac{(a + c + i) - (b + d + f)}{n - l} + \frac{(a + d + j) - (b + c + g)}{n - k} \leq \frac{(a + b + h) - (c + d + e)}{n - m} + 1$$

$$\frac{a - b + c - d - f + i}{n - l} + \frac{a - b - c + d - g + j}{n - k} \leq \frac{a + b - c - d - e + h}{n - m} + 1$$

We now reduce the fractions to common denominators:

$$\frac{(n - k)(n - l)(n - m)(a - b + c - d - f + i)}{n - l} + \frac{(n - k)(n - l)(n - m)(a - b - c + d - g + j)}{n - k}$$

$$\leq \frac{(n - k)(n - l)(n - m)(a + b - c - d - e + h)}{n - m} + (n - k)(n - l)(n - m)$$

$$(n - k)(n - m)(a - b + c - d - f + i) + (n - l)(n - m)(a - b - c + d - g + j)$$

$$\leq (n - k)(n - l)(a + b - c - d - e + h) + (n - k)(n - l)(n - m)$$

$$(n^2 - kn - mn + km)(a - b + c - d - f + i) + (n^2 - ln - mn + lm)(a - b - c + d - g + j)$$

$$\leq (n^2 - kn - ln + kl)(a + b - c - d - e + h)$$

$$+ (n^3 - kn^2 - ln^2 - mn^2 + kln + kmn + lmn - klm)$$

Next, we move everything to the right side, order everything by powers of n and simplify:

$$0 \leq n^3 + n^2(-a + 3b - c - d - e + f + g + h - i - j - k - l - m)$$

$$+ n(-2bk + 2ck + ek - fk - hk + ik + kl + km)$$

$$+ n(-2bl + 2dl + el - gl - hl + jl + lm)$$

$$+ n(2am - 2bm - fm - gm + im + jm) + kl(a + b - c - d - e + h - m)$$

$$+ km(-a + b - c + d + f - i) + lm(-a + b + c - d + g - j)$$

We can rewrite the n<sup>2</sup> term as follows:

$$n^2(-a + 3b - c - d - e + f + g + h - i - j - k - l - m) = n^2(4b + 2f + 2g + 2h - n)$$

$$= n^2(4b + 2f + 2g + 2h) - n^3$$

Inserting it back into the inequality and simplifying gives:

$$0 \leq n^2(4b + 2f + 2g + 2h) + n(-2bk + 2ck + ek - fk - hk + ik + kl + km)$$

$$+ n(-2bl + 2dl + el - gl - hl + jl + lm)$$

$$+ n(2am - 2bm - fm - gm + im + jm) + kl(a + b - c - d - e + h - m)$$

$$+ km(-a + b - c + d + f - i) + lm(-a + b + c - d + g - j)$$

Given that a-n are all ≥0, we need to find terms that cancel each of the negative terms, first for negative 'n' terms:

$$\{-2bkn, -fkn, -hkn, -2bln, -gln, -hln, -2bmn, -fmn, -gmn\}$$

From we can rewrite the n<sup>2</sup> term as follows:



$$\begin{aligned}
n^2(4b + 2f + 2g + 2h) &= 4bn^2 + 2fn^2 + 2gn^2 + 2hn^2 \\
&= \dots + 4bkn + 4bln + 4bmn + \dots + 2fkn + 2fmn + \dots + 2gln + 2gmn + \dots \\
&\quad + 2hkn + 2hln + \dots
\end{aligned}$$

Subtracting the negative 'n' terms gives:

$$\begin{aligned}
&\dots + 4bkn + 4bln + 4bmn + \dots + 2fkn + 2fmn + \dots + 2gln + 2gmn + \dots + 2hkn + 2hln + \dots \\
&\quad - 2bkn - fkn - hkn - 2bln - gln - hln - 2bmn - fmn - gmn \\
&= \dots + 2bkn + 2bln + 2bmn + \dots + fkn + fmn + \dots + gln + gmn + \dots + hkn \\
&\quad + hln + \dots = x
\end{aligned}$$

This has cancelled out all negative 'n' terms:

$$\begin{aligned}
0 \leq n^2(x) + n(2ck + ek + ik + kl + km) + n(2dl + el + jl + lm) + n(2am + im + jm) \\
\quad + kl(a + b - c - d - e + h - m) + km(-a + b - c + d + f - i) \\
\quad + lm(-a + b + c - d + g - j)
\end{aligned}$$

Next, we find 'n' terms that cancel the negative terms in the 'kl', 'km' and 'lm' terms:

$$\begin{aligned}
&\{-ckl, -dkl, -ekl, -klm, -akm, -ckm, -ikm, -alm, -dlm, -jlm\} \\
&n(2ck + ek + ik + kl + km) + n(2dl + el + jl + lm) + n(2am + im + jm) \\
&\quad = \dots + 2ckl + 2ckm + \dots + ekl + \dots + ikm + \dots + klm + \dots + 2dkl + \dots + 2dlm \\
&\quad + \dots + jlm + \dots + 2akm + 2alm + \dots
\end{aligned}$$

Subtracting the negative terms from the 'n' terms gives:

$$\begin{aligned}
&\dots + 2ckl + 2ckm + \dots + ekl + \dots + ikm + \dots + klm + \dots + 2dkl + \dots + 2dlm + \dots + jlm + \dots \\
&\quad + 2akm + 2alm + \dots - ckl - dkl - ekl - klm - akm - ckm - ikm - alm \\
&\quad - dlm - jlm = \dots + ckl + ckm + \dots + dkl + \dots + dlm + \dots + akm + alm + \dots \\
&= y
\end{aligned}$$

This has cancelled out all remaining negative terms and inserting it back into the equality leaves us with only non-negative terms:

$$0 \leq n^2(x) + n(y) + kl(a + b + h) + km(b + d + f) + lm(b + c + g)$$

Since all a-n are  $\geq 0$ , the triangle inequality has thus been proven and the ACC distance is valid.

## SUPPLEMENTARY REFERENCES

- 1 Posma, J. M. *et al.* Subset Optimization by Reference Matching (STORM): An Optimized Statistical Approach for Recovery of Metabolic Biomarker Structural Information from (1)H NMR Spectra of Biofluids. *Analytical chemistry* **84**, 10694-10701, doi:10.1021/ac302360v (2012).
- 2 Mente, A., Irvine, E. J., Honey, R. J. D. & Logan, A. G. Urinary Potassium Is a Clinically Useful Test to Detect a Poor Quality Diet. *Journal of Nutrition* **139**, 743-749, doi:10.3945/jn.108.098319 (2009).
- 3 Lang, R. *et al.* Development of a Hydrophilic Liquid Interaction Chromatography-High-Performance Liquid Chromatography-Tandem Mass Spectrometry Based Stable Isotope Dilution Analysis and Pharmacokinetic Stud Bioactive Pyridines in Human Plasma and Urine after Coffee Consumption. *Analytical chemistry* **82**, 1486-1497, doi:Doi 10.1021/Ac902616k (2010).
- 4 Posma, J. M. *et al.* Integrated Analytical and Statistical Two-Dimensional Spectroscopy Strategy for Metabolite Identification: Application to Dietary Biomarkers. *Analytical chemistry* **89**, 3300-3309, doi:10.1021/acs.analchem.6b03324 (2017).
- 5 Heinzmann, S. S., Holmes, E., Kochhar, S., Nicholson, J. K. & Schmitt-Kopplin, P. 2-Furoylglycine as a Candidate Biomarker of Coffee Consumption. *J Agr Food Chem* **63**, 8615-8621, doi:10.1021/acs.jafc.5b03040 (2015).
- 6 Aburto, N. J. *et al.* Effect of lower sodium intake on health: systematic review and meta-analyses. *BMJ* **346**, f1326, doi:10.1136/bmj.f1326 (2013).
- 7 Kesteloot, H. *et al.* Relation of urinary calcium and magnesium excretion to blood pressure: The International Study Of Macro- And Micro-nutrients And Blood Pressure and The International Cooperative Study On Salt, Other Factors, And Blood Pressure. *American journal of epidemiology* **174**, 44-51, doi:10.1093/aje/kwr049 (2011).
- 8 Elliott, P. *et al.* Urinary metabolic signatures of human adiposity. *Sci Transl Med* **7**, 285ra262, doi:10.1126/scitranslmed.aaa5680 (2015).
- 9 Garcia-Perez, I. *et al.* Urinary Metabolic Phenotyping the slc26a6 (Chloride-Oxalate Exchanger) Null Mouse Model. *J Proteome Res* **11**, 4425-4435, doi:10.1021/pr2012544 (2012).
- 10 Holmes, E. *et al.* Human metabolic phenotype diversity and its association with diet and blood pressure. *Nature* **453**, 396-400, doi:10.1038/Nature06882 (2008).
- 11 Alper, S. L. & Sharma, A. K. The SLC26 gene family of anion transporters and channels. *Molecular aspects of medicine* **34**, 494-515, doi:10.1016/j.mam.2012.07.009 (2013).
- 12 Nicar, M. J., Skurla, C., Sakhaee, K. & Pak, C. Y. Low urinary citrate excretion in nephrolithiasis. *Urology* **21**, 8-14 (1983).
- 13 Hamm, L. L. Renal handling of citrate. *Kidney international* **38**, 728-735 (1990).
- 14 Simpson, D. P. Citrate excretion: a window on renal metabolism. *Am J Physiol* **244**, F223-234, doi:10.1152/ajprenal.1983.244.3.F223 (1983).
- 15 Heinzmann, S. S. *et al.* Metabolic profiling strategy for discovery of nutritional biomarkers: proline betaine as a marker of citrus consumption. *Am J Clin Nutr* **92**, 436-443, doi:10.3945/ajcn.2010.29672 (2010).
- 16 Gibbons, H. *et al.* Demonstration of the utility of biomarkers for dietary intake assessment; proline betaine as an example. *Molecular nutrition & food research* **61**, doi:10.1002/mnfr.201700037 (2017).
- 17 Pujos-Guillot, E. *et al.* Mass Spectrometry-based Metabolomics for the Discovery of Biomarkers of Fruit and Vegetable Intake: Citrus Fruit as a Case Study. *J Proteome Res* **12**, 1645-1659, doi:10.1021/pr300997c (2013).
- 18 Bang, J. W. *et al.* Integrative top-down system metabolic modeling in experimental disease states via data-driven Bayesian methods. *J Proteome Res* **7**, 497-503, doi:10.1021/pr070350l (2008).

- 19 Knights, K. M., Sykes, M. J. & Miners, J. O. Amino acid conjugation: contribution to the metabolism and toxicity of xenobiotic carboxylic acids. *Expert opinion on drug metabolism & toxicology* **3**, 159-168, doi:10.1517/17425255.3.2.159 (2007).
- 20 Garcia-Perez, I. *et al.* Objective assessment of dietary patterns by use of metabolic phenotyping: a randomised, controlled, crossover trial. *The lancet. Diabetes & endocrinology* **5**, 184-195, doi:10.1016/S2213-8587(16)30419-3 (2017).
- 21 Micozzi, M. S., Albanes, D., Jones, D. Y. & Chumlea, W. C. Correlations of body mass indices with weight, stature, and body composition in men and women in NHANES I and II. *Am J Clin Nutr* **44**, 725-731 (1986).
- 22 Iwahori, T. *et al.* Six random specimens of daytime casual urine on different days are sufficient to estimate daily sodium/potassium ratio in comparison to 7-day 24-h urine collections. *Hypertension research : official journal of the Japanese Society of Hypertension* **37**, 765-771, doi:10.1038/hr.2014.76 (2014).
- 23 Wilson, T. *et al.* Spot and Cumulative Urine Samples Are Suitable Replacements for 24-Hour Urine Collections for Objective Measures of Dietary Exposure in Adults Using Metabolite Biomarkers. *The Journal of nutrition* **149**, 1692-1700, doi:10.1093/jn/nxz138 (2019).
- 24 Heinzmann, S. S. *et al.* Stability and Robustness of Human Metabolic Phenotypes in Response to Sequential Food Challenges. *J Proteome Res* **11**, 643-655, doi:10.1021/Pr2005764 (2012).
- 25 Stella, C. *et al.* Susceptibility of human metabolic phenotypes to dietary modulation. *J Proteome Res* **5**, 2780-2788, doi:10.1021/Pr060265y (2006).
- 26 Dumas, M. E. *et al.* Assessment of analytical reproducibility of H-1 NMR spectroscopy based metabolomics for large-scale epidemiological research: the INTERMAP study. *Analytical chemistry* **78**, 2199-2208, doi:10.1021/Ac0517085 (2006).
- 27 Smith, L. M. *et al.* Large-Scale Human Metabolic Phenotyping and Molecular Epidemiological Studies-via H-1 NMR Spectroscopy of Urine: Investigation of Borate Preservation. *Analytical chemistry* **81**, 4847-4856, doi:10.1021/ac9004875 (2009).
- 28 Keun, H. C. *et al.* Analytical reproducibility in H-1 NMR-based metabolomic urinalysis. *Chem Res Toxicol* **15**, 1380-1386, doi:Doi 10.1021/Tx0255774 (2002).
- 29 Nicholson, J. K. *et al.* Metabolic phenotyping in clinical and surgical environments. *Nature* **491**, 384-392, doi:10.1038/nature11708 (2012).
- 30 Garcia-Perez, I. *et al.* An Analytical Pipeline for Quantitative Characterization of Dietary Intake: Application To Assess Grape Intake. *J Agric Food Chem* **64**, 2423-2431, doi:10.1021/acs.jafc.5b05878 (2016).
- 31 Luft, F. C., Fineberg, N. S. & Sloan, R. S. Overnight Urine Collections to Estimate Sodium-Intake. *Hypertension* **4**, 494-498, doi:Doi 10.1161/01.Hyp.4.4.494 (1982).
- 32 Heitmann, B. L. & Lissner, L. Dietary underreporting by obese individuals--is it specific or non-specific? *BMJ* **311**, 986-989 (1995).
- 33 Rennie, K. L., Coward, A. & Jebb, S. A. Estimating under-reporting of energy intake in dietary surveys using an individualised method. *The British journal of nutrition* **97**, 1169-1176, doi:10.1017/S0007114507433086 (2007).
- 34 Freisling, H. *et al.* Dietary reporting errors on 24 h recalls and dietary questionnaires are associated with BMI across six European countries as evaluated with recovery biomarkers for protein and potassium intake. *The British journal of nutrition* **107**, 910-920, doi:10.1017/S0007114511003564 (2012).
- 35 Stamler, J. *et al.* Dietary and urinary metabolomic factors possibly accounting for higher blood pressure of black compared with white americans: results of international collaborative study on macro-/micronutrients and blood pressure. *Hypertension* **62**, 1074-1080, doi:10.1161/HYPERTENSIONAHA.113.01810 (2013).
